1 **Rescue of stalled clathrin-mediated endocytosis by asymmetric Arp2/3-mediated actin**  
2 **assembly**

3

4 Meiyang Jin<sup>1\*</sup>, Cyna Shirazinejad<sup>1,2\*</sup>, Bowen Wang<sup>3</sup>, Amy Yan<sup>1</sup>, Johannes Schöneberg<sup>1,4</sup>,  
5 Srigokul Upadhyayula<sup>1</sup>, Ke Xu<sup>3</sup>, David G. Drubin<sup>1#</sup>

6

7 <sup>1</sup> Department of Molecular and Cell Biology, University of California, Berkeley, CA 94720

8 <sup>2</sup> Biophysics Graduate Group, University of California Berkeley; Berkeley, CA, 94720

9 <sup>3</sup> Department of Chemistry, University of California, Berkeley, CA 94720

10 <sup>4</sup> Current address: Department of Pharmacology, and Department of Chemistry and  
11 Biochemistry, University of California, San Diego, CA 92093

12

13 \*These authors contributed equally.

14 #Correspondence to DGD ([drubin@berkeley.edu](mailto:drubin@berkeley.edu))

15

16 **Author contributions**

17 MJ, CS and DGD conceived the study and experiments. MJ and AY generated the genome-  
18 edited cell lines. MJ performed live cell data acquisition and sample preparation for super-  
19 resolution microscopy. BW and KX performed super-resolution microscopy and super-resolution  
20 data reconstruction. CS developed computational analysis tools and SU, JS, and MJ supported  
21 the data analysis. MJ and CS prepared the figures and MJ and DGD wrote the manuscript with  
22 feedback from the other authors.

23

## 24 **Abstract**

25 Actin assembly facilitates vesicle formation in several trafficking pathways. Clathrin-mediated  
26 endocytosis (CME) shows elevated actin assembly dependence under high membrane tension.  
27 Why actin assembly at CME sites occurs heterogeneously even within the same cell, and how  
28 assembly forces are harnessed, are not fully understood. Here, endocytic dynamics, actin  
29 presence, and geometry of CME proteins from three different functional modules, were analyzed  
30 using three-dimensional (3D) super-resolution microscopy, live-cell imaging, and machine-  
31 learning-based computation. When hundreds of CME events were compared, sites with actin  
32 assembly showed a distinct signature, a delay between completion of coat expansion and vesicle  
33 scission, indicating that actin assembly occurs preferentially at stalled CME sites. N-WASP is  
34 recruited to one side of CME sites where it is positioned to stimulate asymmetric actin assembly.  
35 We propose that asymmetric actin assembly rescues stalled CME sites by pulling vesicles into  
36 the cell much like a bottle opener pulls off a bottle cap.

37

## 38 **Introduction**

39 Formation of clathrin-coated vesicles requires forces to first bend the membrane into a  
40 sphere or tube, and to then break the thin neck that connects the vesicle to the plasma membrane.  
41 These forces are generated through the combined actions of actin filament assembly and proteins  
42 that directly bend the membrane<sup>1-5</sup> (Supplementary Fig. 1a). Several studies have demonstrated  
43 that dependence of CME on actin assembly increases under elevated membrane tension<sup>6-9</sup>.  
44 Interestingly, actin does not assemble at all CME sites in mammalian cells, suggesting highly  
45 localized differences in requirement for actin assembly, that nature of which are obscure<sup>10-12</sup>. A  
46 detailed understanding of how actin forces are harnessed to aid vesicle formation and scission,

47 and whether and how actin assembly might mediate an adaptive response to the opposing forces  
48 such as membrane tension and turgor pressure, depends on understanding which CME sites  
49 assemble actin, where filament assembly occurs around the endocytic membrane and when. In  
50 yeast cells, where turgor pressure is particularly high, super-resolution data suggest that actin  
51 assembles symmetrically around CME sites and indicate that actin regulators including Las17,  
52 which is yeast WASP, are present in a ring surrounding the base of the clathrin coat  
53 symmetrically<sup>13</sup>. On the other hand, studies on fixed mammalian cells raised the possibility that  
54 actin assembly may at least in some cases be initiated asymmetrically at clathrin coats<sup>14,15</sup>.  
55 However, methods used for these studies prevented analysis of large numbers of sites, and  
56 suffered from possible loss of actin filaments during unroofing and extraction of the cells. Which  
57 CME sites assemble actin, and how actin networks are organized with respect to CME sites, has  
58 not been determined systematically, in a large-scale, unbiased manner, particularly in live  
59 mammalian cells. This information is essential to understanding how and why actin assembly  
60 forces are harnessed for CME.

61 Here, by combining fixed and live-cell imaging of triple-genome-edited, human induced  
62 pluripotent stem cells (iPSCs), and newly developed machine-learning-based computational  
63 analysis tools, we report that N-WASP and Arp2/3 complex localize at one side of the coat and  
64 neck of invaginating endocytic sites until the scission, similar to what was proposed  
65 previously<sup>14,15</sup>. Most importantly, by comparing recruitment dynamics of proteins from three  
66 distinct endocytic modules for over one thousand endocytic events, we found that branched actin  
67 assembly occurs predominantly at sites that have stalled between coat expansion and scission.  
68 We propose that these branched actin networks rescue stalled CME.

69

## 70 **Results**

### 71 **Super-resolution imaging reveals asymmetric actin distribution around endocytic sites**

72 To investigate the physiological roles and spatiotemporal regulation of actin assembly at  
73 CME sites in mammalian cells, we applied genome-editing techniques to generate a human iPSC  
74 line (hereafter referred to as ADA cells) that co-expresses a TagRFP-T fusion of the mu1 subunit  
75 of the AP2 adaptor complex (AP2M1), a TagGFP2 fusion of dynamin2 (DNM2), and a HaloTag  
76 fusion of the ARPC3 subunit of the Arp2/3 complex as representatives of the CME coat,  
77 scission and actin modules respectively<sup>2,16,17</sup> (Supplementary Fig. 1 and Supplementary Video 1,  
78 2). Previous studies showed that endogenously tagged AP2M1, DNM2 and ARPC3 can serve as  
79 reliable markers of these CME functional modules that avoid disruption of physiological  
80 spatiotemporal organization of the process as might be caused by overexpression of fluorescently  
81 labeled proteins<sup>12,18–21</sup>. We observed dynamic CME events on the basal plasma membrane of the  
82 genome-edited cells using Total Internal Reflection Fluorescence (TIRF) microscopy  
83 (Supplementary Fig. 1c). Consistent with previous studies, AP2 is recruited at early CME stages  
84 while DNM2 is recruited in two phases<sup>10,16,20,22</sup>. At the early stage of CME, a relatively small  
85 amount of DNM2 is recruited to CME sites. Shortly before the end of a CME event, the DNM2  
86 recruitment rate increases rapidly with DNM2 levels reaching a peak concomitant with vesicle  
87 scission<sup>16,20,23</sup> (Supplementary Fig. 1c). This later rapid-recruitment phase represents the  
88 assembly of the dynamin helix on the highly curved neck of the budding vesicle after the U to  $\Omega$   
89 shape transition of the endocytic membrane<sup>20,23–27</sup>.

90 Super-resolution imaging of fixed human skin melanoma SKMEL cells observed asymmetry  
91 of actin arrangement around CME sites<sup>7</sup>, consistent with observations from previous studies<sup>14,15</sup>.  
92 To analyze how actin networks are organized at CME sites in iPS cells, we first performed two-

93 color 3D Stochastic Optical Reconstruction Microscopy (STORM) imaging<sup>28</sup> on fixed ADA  
94 cells, localizing either AF647 phalloidin-labeled actin filaments<sup>29</sup> or HaloTag-fused ARPC3 at  
95 CME sites. Due to the dense phalloidin labelling of cortical actin filaments under the plasma  
96 membrane, it was often challenging to unambiguously identify the CME-specific actin structures  
97 in iPSCs. However, in regions with thinner cortical actin layers, we observed that actin was  
98 typically distributed asymmetrically around CME sites (Fig. 1a, b), consistent with what has  
99 been observed in different mammalian cell lines by STORM or EM imaging approaches<sup>7,15</sup>.  
100 Antibody labeling of ARPC3-Halotag in the ADA cells had the advantage of a less complex  
101 staining pattern. Besides being highly concentrated in lamellipodia, ARPC3 was associated with  
102 CME sites asymmetrically, like actin (Fig 1c, d). These data suggest an asymmetric Arp2/3-  
103 mediated actin network arrangement around CME sites.

104

### 105 **Asymmetric branched actin networks assembled at CME sites persist through scission**

106 We next used ADA cells to investigate actin assembly at CME sites in live cells, which has  
107 several advantages over studies in fixed cells. During the fixation and subsequent sample  
108 preparation, actin structures may not be faithfully preserved. In addition, in fixed cells it is very  
109 difficult to identify the stage of the CME, so the timing, geometry and dynamics of actin  
110 assembly cannot be related to the endocytic stage. More importantly, only by using live cells is it  
111 possible to trace a single CME event from start to finish, and to therefore identify those CME  
112 events wherein no detectable actin is ever assembled so key parameters can be compared  
113 between events with and without associated actin assembly.

114 By visualizing endogenously tagged AP2M1 to mark the coat and CME initiation, and  
115 DNM2 to mark the neck and scission, together with ARPC3 to specifically label Arp2/3-

116 nucleated, branched actin filaments (Supplementary Fig. 1a), we were able to precisely study the  
117 spatial and temporal regulation of actin assembly during CME. Three-color labeling and analysis  
118 of the displacement between markers for the three modules allowed us to distinguish *bona fide*  
119 asymmetric actin assembly from events that artificially might appear asymmetric because the  
120 invaginations were elongated and tilted (Fig2 a). Using TIRF live-cell imaging, we observed  
121 ARPC3-labeled branched actin networks at lamellipodia and a subpopulation of CME sites (Fig.  
122 2b, c). Dynamic actin assembly and disassembly occurred at CME sites with different spatio-  
123 temporal characteristics, including discrete CME sites, clathrin plaques and at clathrin coat  
124 splitting sites, as previously reported<sup>14</sup> (Fig. 2d and Supplementary Fig. 2a, b). In the analysis  
125 described below, we focus on the discrete CME events and not the more complex ones (plaques  
126 and splitting events). Analysis of these events with 1s/frame temporal resolution revealed that  
127 ARPC3 is most robustly recruited during the late stages of CME shortly before scission<sup>12</sup> (Fig.  
128 2c, d). Interestingly, we observed clear spatial displacement between ARPC3 (actin module) and  
129 AP2 (coat module) as well as between ARPC3 and DNM2 (neck) before vesicle scission (Fig.  
130 2d). This observation supports the conclusion that asymmetric branched actin networks provide  
131 forces at endocytic sites through the time of scission. Imaging fluorescent beads using the same  
132 settings indicates that the displacement is not an artifact caused by misalignment between  
133 different imaging channels (Supplementary Video 3 and Supplementary Fig. 2c).

134 To analyze the intrinsic recruitment order and timing for up to three endocytic proteins at  
135 CME sites quantitatively and systematically, we developed an automated, high-throughput  
136 method that avoids bias because it does not involve manual selection of CME sites (see Materials  
137 and Methods). Briefly, AP2 tracks were identified using standard particle-tracking algorithms<sup>30</sup>.  
138 Novel filtering methods then extracted DNM2-positive events marked by one or more DNM2

139 burst. The AP2 and DNM2 tracks were decomposed into dynamic features describing the events'  
140 position and brightness. These features were used for clustering via unsupervised machine  
141 learning, which enabled grouping of similarly-behaved tracks (Supplementary Fig. 3a and b).  
142 DNM2-positive events were refined by a detection scheme that determined the number of DNM2  
143 peaks using various characteristics of a single DNM2-peak: the peak height, width, and  
144 minimum peak-to-peak distance (Supplementary Fig. 3c). Events with a single DNM2 peak were  
145 analyzed as described below. The method detects low signals from endogenously tagged CME  
146 proteins, such as the low-level recruitment of DNM2 at the early stages of CME, and accurately  
147 reveals the different CME stages (Extended Data Fig. 3d).

148       Next, the timing of actin network assembly at CME sites was determined using ARPC3 as a  
149 branched actin filament marker by analyzing over one thousand CME events. Although actin  
150 appearance early in CME has been reported<sup>14</sup>, determining the actin assembly timing is  
151 challenging because it is difficult to distinguish newly assembled branched actin at CME sites  
152 from the nearby cortical actin filaments or actin filaments attached to other vesicles or  
153 organelles. Also, whether actin functions during the early stage of CME has not yet been shown  
154 conclusively due to the potential side effects such as changes in membrane tension caused by  
155 actin inhibitors. Our endogenous ARPC3 tagging and large-scale computational analysis  
156 approach sidesteps these problems. We classified ARPC3 positive CME events into two groups:  
157 one group with ARPC3 appearance early in CME, and the other with late appearance in CME  
158 (Fig. 3a). We observed that in most of the events (N=1,385, 67.8%) a sharply increasing ARPC3  
159 signal appears with similar timing to the rapid-recruitment phase of DNM2 concomitant with the  
160 U to  $\Omega$  membrane shape transition. This timing is consistent with previously proposed role for  
161 actin in membrane invagination, as studies showed that actin inhibitors block the U to  $\Omega$

162 endocytic membrane shape transition<sup>6,14</sup>. In some cases (N=657, 32.2%) we detected ARPC3  
163 signals at early CME stages. To test whether random overlap between nearby actin structures and  
164 CME sites might be responsible for the apparent early actin recruitment, we generated a  
165 randomized data set by pairing ARPC3 images with AP2 and DNM2 images from an unrelated  
166 movie (Fig. 3b). In this data set, we detected early “assembly” of actin in the majority of ARPC3  
167 positive CME events (N=17,282, 72.9%), and the intensity profiles of these events resembled the  
168 early-actin CME events we observed in the real data set (Fig. 3a, b). Therefore, we conclude that  
169 the presence of actin early in CME is very likely due to unrelated nearby actin structures  
170 overlapping with CME sites.

171 Our live-cell analysis allowed the timing of branched actin network assembly to be  
172 compared to the scission timing, and the spatial offset between the clathrin coat and the  
173 associated actin network to be determined. Super-resolution imaging of yeast CME sites  
174 suggested that actin and actin nucleators localize symmetrically in a ring around CME sites, and  
175 computational modeling suggested that an asymmetric actin arrangement would not provide  
176 sufficient force for the membrane invagination during yeast CME<sup>13</sup>. In contrast, in mammalian  
177 cells, which require less actin force production during CME, imaging of fixed cells suggested  
178 that actin structures associate adjacent to apparent flat clathrin coats. However, these studies  
179 proposed that at the later CME stages the actin structures become larger and more symmetric to  
180 provide sufficient force for membrane deformation and scission<sup>14,15</sup>. Surprisingly, in our live cell  
181 studies designed to highlight sites of new actin assembly, we observed off-centered branched  
182 actin networks at CME sites throughout even the latest CME stages (Fig. 2d). Furthermore, most  
183 ARPC3-positive CME sites accomplish scission within 30s from the initiation of ARPC3  
184 recruitment (Fig. 3c). The actin networks were off center from the coat and neck signals by



185 approximately 150nm at the time of vesicle scission (Fig. 3d). Given the temporal separation  
186 between channel acquisition and the movement of AP2 spots, the separation between channels  
187 can be attributed in part to an imaging artifact. Therefore, when we measured the average  
188 movement of AP2 spots leading up to scission as a control, we found that over 95% of the events  
189 had AP2-ARPC3 separations that exceed the frame-to-frame motility of AP2 (Supplementary  
190 Fig 4). Also, the uncertainties measured by a standard deviation, when measuring the fitted  
191 position of AP2, range up to 40 nm. Therefore, we include the AP2-DNM2 separation as a basis  
192 for comparison to the AP2-ARPC3 and DNM2-ARPC3 separations (Fig 3d). These results  
193 further support our conclusion that branched actin networks assemble asymmetrically at CME  
194 sites through the time of scission (Fig 2d). This observation is consistent with the observation  
195 that ring-shaped actin structures at clathrin coats were rarely observed in the high-resolution,  
196 live-cell imaging in a previous study<sup>31</sup>. In total, these live-cell data suggest that in mammalian  
197 cells, asymmetric actin network assembly can provide enough force to assist membrane  
198 deformation and scission during the late stages of CME.

199

## 200 **Asymmetric branched actin networks facilitate CME at stalled sites**

201 To gain additional insights into the function of this asymmetric actin network assembly, we  
202 quantitatively compared kinetics of CME events with or without ARPC3 recruitment. We  
203 observed that about 30% of CME events are completed in the absence of detectable actin  
204 assembly, which is consistent with the hypothesis that in mammalian cells actin assembly is  
205 required for CME only under relatively high membrane tension, which can vary regionally  
206 within cells<sup>6,7,9</sup>. Consistent with the possibility that increased membrane tension stalls membrane  
207 deformation during CME<sup>4,8,9,32-34</sup>, CME lifetimes were markedly longer for ARPC3 positive

208 events compared to the ARPC3 negative events (Fig. 4a). In addition, when the AP2M1 intensity  
209 vs time profiles were compared between ARPC3 positive and negative CME sites, a plateau,  
210 which lasts for approximately 10 seconds, was observed for the ARPC3 positive events (Fig. 4b).  
211 Based on these observations and previous experimental and computational modeling data<sup>4,6,7</sup>, we  
212 propose that this plateau in branched actin-positive CME events represents stalled membrane  
213 bending due to an unfavorable local membrane environment, such as higher membrane  
214 tension<sup>4,32,33</sup>.

215 We next tested the hypothesis that the asymmetric actin network might affect the lateral  
216 movements of endocytic coats on the plasma membrane. Interestingly, the ARPC3 positive CME  
217 sites showed significantly slower, but more directional lateral movement before the scission  
218 compared to the ARPC3 negative CME sites (Fig. 4c, d). After scission both ARPC3 positive  
219 and negative vesicles showed fast, apparently random movements (Fig. 4c, d). These data  
220 suggest that the asymmetric actin can stabilize the forming endocytic coat while pushing it in the  
221 plane of the plasma membrane with a lateral directional force.

222

### 223 **N-WASP is recruited asymmetrically to the stalled CME sites**

224 To further explore how the asymmetrical assembly of actin networks at CME sites is  
225 regulated, we endogenously tagged N-WASP, an actin nucleation promoting factor (NPF) that  
226 plays roles in CME, in AP2M1-tagRFP-T/ DNM2-tagGFP2 genome-edited iPSCs (hereafter  
227 referred to as ADW cells, Fig. 5a and Supplementary Fig. 5a). Quantitative imaging of budding  
228 yeasts demonstrated that initiation of productive actin assembly at CME sites requires the  
229 accumulation of yeast WASP or WIP to a certain amount<sup>35</sup>. In our genome-edited iPS cells, we  
230 observed that N-WASP is recruited asymmetrically to CME sites mostly at the late stage of CME

231 (Fig. 5b, c and Supplementary Fig. 5b, c). Longer lifetimes and a plateau in the AP2 intensity vs  
232 time plot were observed specifically in the N-WASP positive CME events (Fig. 5d, e), similar to  
233 the ARPC3 positive events (Fig 4 a, b). These data indicate that asymmetric NPF recruitment  
234 underlies the asymmetric architecture of branched actin networks at CME sites.

235

## 236 **Discussion**

237 Using large-scale, comprehensive analysis of thousands of CME sites in unperturbed live  
238 cells, our study demonstrates that in mammalian cells coat assembly dynamics predict which  
239 sites will assemble actin, and show that at apparently stalled sites, actin assembles  
240 asymmetrically to facilitate successful vesicle formation.

241 Based on the data presented here, we propose an updated model for actin assembly at  
242 mammalian CME sites in which, beyond global tension-dependent changes in requirement for  
243 actin assembly, highly localized differences give rise to heterogeneity even within the same  
244 patch of plasma membrane in the same cell (Fig. 6): (1) Where the local membrane tension is  
245 lower (Fig. 6 upper scenario), the membrane can undergo flat-U- $\Omega$  shape transitions without  
246 actin assembly in a relatively short time. When the coat grows large enough to form a  $\Omega$ -shaped  
247 bud, sufficient dynamin can be recruited to perform scission, and there is little delay between  
248 coat expansion and scission; (2) Where the local conditions are not favorable, presumably under  
249 high membrane tension and possibly other impediments, the coat protein-membrane interaction  
250 does not generate sufficient force to curve the membrane (Fig. 6 lower scenario). Here, extra  
251 force generation from actin assembly is required<sup>4,6</sup>. Asymmetric N-WASP recruitment activates  
252 actin nucleation mostly at one side of the clathrin coat, generating an asymmetric force that pulls  
253 the membrane into the cell with a similar action to a bottle cap opener. We speculate that this

254 asymmetrical force contributes to asymmetric membrane deformation at endocytic sites observed  
255 by high-speed atomic force microscopy<sup>36</sup> and may act with dynamin<sup>37</sup> to twist the clathrin pit to  
256 promote scission at the neck. CME events with associated actin assembly have longer lifetimes,  
257 likely due to a delay between coat expansion and scission, requiring adaptive recruitment of actin  
258 regulators followed by actin network assembly and membrane remodeling. This result reinforces  
259 the conclusion from previous studies<sup>6-9</sup> that increased membrane tension enhances the  
260 requirement for actin assembly during CME, but also establishes that site-to-site heterogeneity in  
261 actin dependence and involvement can be observed without manipulating membrane tension.

262 Future computational modeling studies of how asymmetric actin network assembly provides  
263 forces for vesicle formation and membrane remodeling will deepen our understanding of actin's  
264 functions in a host of actin-mediated processes.

265 Our model provides further insights into the basis for inconsistent effects of actin drugs on  
266 CME<sup>6,14,18,38-43</sup>. Actin plays crucial roles in membrane shaping, cell adhesion, and membrane  
267 tension. Global disruption of actin dynamics is expected to dramatically change membrane  
268 tension and the available pool of actin and associated proteins and therefore to have both direct  
269 and indirect effects on CME. Here, we focused on in-depth analysis of the unperturbed process  
270 and detected preference for actin assembly at stalled CME events.

271 The results presented here may prove relevant to the constant coat area vs constant coat  
272 curvature debate for how the clathrin coat assembles and develops curvature<sup>32,44-48</sup>. In the  
273 constant area model, flat clathrin coats grow close to their final size before curvature develops as  
274 a vesicle forms. In the constant curvature model, clathrin coats grow with a fixed curvature. Our  
275 observations suggest that coat expansion and curvature generation may be regulated via distinct  
276 mechanisms, with different actin requirements. At actin-positive CME sites, actin assembles

277 primarily at the late stage of CME when coat assembly is mostly complete (Fig. 3 and  
278 Supplementary Fig. 6a). If the constant curvature model holds, actin should only be associated  
279 with clathrin coats with highly curved dome and spherical shapes (Supplementary Fig. 6b).  
280 However, actin associated with flat or shallow clathrin coats has been observed in multiple  
281 studies<sup>7,15</sup>, which supports the constant area model at actin-positive CME sites (Supplementary  
282 Fig. 6c). On the other hand, mathematical modeling predicts that at actin-negative CME sites,  
283 where coat and other curvature-promoting proteins provide sufficient force to bend the  
284 membrane<sup>23</sup>, the membrane is smoothly and continuously shaped by these proteins into a budded  
285 morphology as the coat area increases<sup>4</sup>, which follows the constant curvature model. Perhaps the  
286 constant area model applies primarily for actin-negative sites and the constant area model applies  
287 primarily for actin-positive sites, which we have shown here are mostly stalled CME sites. We  
288 suggest that in future studies the constant coat area and constant coat curvature models be tested  
289 at individual CME events to test the possibility that both mechanisms operate in the same cell.

290 **Acknowledgments:** MJ was funded by American Heart Association Postdoctoral Fellowship  
291 (18POST34000029). DGD was funded by NIH MIRA grant R35GM118149. KX is a  
292 Chan Zuckerberg Biohub investigator and acknowledges support from NIH (DP2GM132681).  
293 SU was funded by Philomathia Foundation and the Chan Zuckerberg Initiative Imaging Scientist  
294 program. The authors would like to thank Dr. Yidi Sun and Dr. Matthew Akamatsu for insightful  
295 comments on the manuscript; the Conklin Lab at UCSF for providing WTC10 human iPSC line;  
296 the Lavis Lab at Janelia Research Campus for providing JF635 HaloTag ligand; Dr. Sun Hae  
297 Hong for generating the AP2-tagRFP-T iPSC cell line; the UC Berkeley QB3 MacroLab for  
298 purified *S. pyogenes* NLS-Cas9; the UC Berkeley Cancer Research Laboratory Flow Cytometry  
299 Facility for iPSC sorting.

300

#### 301 **Data availability**

302 The raw live-cell imaging data (TIRF) can be found at  
303 [https://github.com/DrubinBarnes/Jin\\_Shirazinejad\\_et\\_al\\_branched\\_actin\\_manuscript](https://github.com/DrubinBarnes/Jin_Shirazinejad_et_al_branched_actin_manuscript). All other  
304 raw data are available from the corresponding author upon request.

305

#### 306 **Code availability**

307 The Jupyter Notebooks used for live-cell imaging analysis can be found at  
308 [https://github.com/DrubinBarnes/Jin\\_Shirazinejad\\_et\\_al\\_branched\\_actin\\_manuscript](https://github.com/DrubinBarnes/Jin_Shirazinejad_et_al_branched_actin_manuscript).

309

310 **METHODS**

311

312 **Cell culture**

313 The WTC10 hiPSC line was obtained from the Bruce Conklin Lab at UCSF. hiPSCs were  
314 cultured on Matrigel (hESC-Qualified Matrix, Corning) in StemFlex medium (Thermo Fisher)  
315 with Penicillin/ Streptomycin in 37°C, 5% CO<sub>2</sub>. Cultures were passaged with Gentle Cell  
316 Dissociation reagent (StemCell Technologies, Cat#: 100-0485) twice every week.

317

318 **Genome-editing**

319 The AP2M1 gene was edited in WTC10 hiPSCs as previously described using TALENs  
320 targeting exon 7 of the AP2M1 gene<sup>49</sup>. Both alleles of AP2M1 were tagged with tagRFP-T. The  
321 Cas9-crRNA322 ARPC3 gene in AP2M1-tagRFP-T genome-edited hiPSCs, as previously described<sup>12,18</sup>. The  
323 same method was used to edit the WASL gene in AP2M1-tagRFP-T/DNMT2-tagGFP2 genome  
324 edited hiPSCs. *S. pyogenes* NLS-Cas9 was purified in the University of California Berkeley QB3  
325 MacroLab. TracrRNA and crRNA that target CCTGCTCGACTAGGCCTCGA (DNMT2),  
326 CCTGGACAGTGAAGGGAGCC (ARPC3) and AGCTCATGGTTTCGCCGGCG (WASL),  
327 were purchased from IDT. Gibson assembly (New England Biolabs) was used to construct donor  
328 plasmids containing DNMT2 5' homology-ggtaccagtggcggaagc-tagGFP2-DNMT2 3' homology,  
329 ARPC3 5' homology-ggatccggtaccagcgtaccaccggtcgccacc-HaloTag-ARPC3 3' homology, and  
330 WASL 5' homology-HaloTag-agcgatccaccggtcgccaccggatcc-WASL 3' homology sequences,  
331 respectively. Three days after electroporation (Lonza, Cat#: VPH-5012) of the Cas9-crRNA-  
332 tracrRNA complex and donor plasmid, the tagGFP2 or HaloTag positive cells were single cell

333 sorted using a BD Bioscience Influx sorter (BD Bioscience) into Matrigel-coated 96-well plates.  
334 Clones were confirmed by PCR and Sanger sequencing of the genomic DNA locus around the  
335 insertion site. Both alleles of DNMT2 and ARPC3 were tagged with tagGFP2 and HaloTag,  
336 respectively, and one allele of WASL was tagged with HaloTag in the hiPSC lines used in this  
337 study.

338

### 339 **Western blotting**

340 Cells were dissociated from the well using Gentle Cell Dissociation reagent (StemCell  
341 Technologies, Cat#: 100-0485). Total proteins were extracted by adding 1ml of cold 10% TCA  
342 to the cell pellets, incubated on ice for 30min, and spun down by centrifuging at 4 °C, 12000rpm  
343 for 10min. Protein pellets were dissolved in loading buffer (50 mM HEPES, pH 7.4, 150 mM  
344 NaCl, 1 mM MgCl<sub>2</sub>, 5% BME, 5mM DTT and protease inhibitor) and loaded onto an  
345 acrylamide gel for SDS-PAGE and transferred to nitrocellulose membranes for immunoblotting.  
346 Blots were incubated overnight at 4°C with primary antibodies targeting Tag(CGY)FP (1:2000  
347 dilution in 1% milk, Evrogen, Cat#: AB121), HaloTag (1:1000 dilution in 0.5% milk, Promega,  
348 Cat#: G9211), GAPDH (1:100,000 dilution in 0.5% milk, Proteintech, Cat#: 10494-1-AP),  
349 respectively, and subsequently incubated in the dark at room temperature for 1hr with secondary  
350 antibodies.

351

### 352 **TIRF live-cell imaging**

353 Two days before imaging, hiPSCs were seeded onto Matrigel-coated 4-well chambered cover  
354 glasses (Cellvis). Halotag was labeled by JF635- HaloTag ligand<sup>50</sup>. Cells were incubated in  
355 StemFlex medium with 100 mM JF635-HaloTag for 45min and the unbound ligands were



356 washed away by three washes with 5 min incubation in prewarmed StemFlex medium. Cells  
357 were imaged on a Nikon Ti-2 inverted microscope fitted with TIRF optics and a sCMOS camera  
358 (Hamamatsu). Cells were maintained at 37 °C with a stage top incubator (OKO Lab) in  
359 StemFlex medium with 10mM HEPES. Images were acquired with Nikon Elements. Channels  
360 were acquired sequentially at a 1 sec interval and 300ms exposure time over 4 minutes.

361

### 362 **TIRF image processing**

363 Four generalized processing steps were applied identify of clathrin-coated pits with single  
364 DNM2 peaks: track feature abstraction, feature dimensionality reduction, event clustering, and  
365 DNM2-peak detection. First, tracks that are defined by fitted positions and intensities for single  
366 events were generated using *cmeAnalysis*<sup>30</sup>. Then, AP2 and DNM2 tracks were decomposed into  
367 dynamic features describing the dynamics of the events' position and brightness. The mapping of  
368 each track to discrete features was done to generalize the dynamics of tracked events into a set of  
369 interpretable coordinates. These features were clustered after feature scaling to normal  
370 distributions, dimensionality reduction with principal component analysis, and Gaussian mixture  
371 modeling. DNM2-positive events represented a distinct cluster of tracks that had detectable  
372 DNM2 throughout the event, were long lived, and were below the threshold of motility expected  
373 for transient, non-CME-derived clathrin-coated vesicle “visitors” at the TIRF field. Single  
374 DNM2-peak events were found by searching over a range of values set for the minimum DNM2  
375 peak height, width, and peak-to-peak temporal distance. After finding single-peaked events in a  
376 fixed peak-parameter combination, the lifetime distribution of single peak events' lifetimes were  
377 fit to the expected underlying distribution, a Rayleigh distribution<sup>51</sup>, where the best-fitting  
378 parameter combination was chosen to identify single-peaked events. Single DNM2-peaked

379 events were kept as CME sites for the remainder of the analysis. All code associated with this  
380 analysis, generating Figures 3-5, and a detailed step-by-step protocol, are available at  
381 [https://github.com/DrubinBarnes/Jin\\_Shirazinejad\\_et\\_al\\_branched\\_actin\\_manuscript](https://github.com/DrubinBarnes/Jin_Shirazinejad_et_al_branched_actin_manuscript).

382

### 383 **Two-color 3D STORM imaging**

384 12 mm round coverslips were sonicated in distilled water and sterilized for 20 min in 70%  
385 ethanol, air-dried and coated with Matrigel in 24-well plates. Cells were seeded onto Matrigel-  
386 coated coverslips two days before fixation. For clathrin and actin two-color imaging, cells were  
387 fixed first for 1 min in 0.3% (v/v) glutaraldehyde (GA) solution containing 0.25% (v/v) Triton in  
388 cytoskeleton buffer (CB: 10mM MES, 150mM NaCl, 5mM EGTA, 5mM Glucose, 5mM MgCl<sub>2</sub>,  
389 0.005% NaN<sub>3</sub>, pH 6.1) and then immediately fixed for 20 min in 2% (v/v) GA solution in CB.  
390 Both solutions were prepared fresh from a 10% GA stock (Electron Microscopy Science, cat  
391 #16120). After fixation, samples were incubated twice for 5 min in freshly prepared 0.1% (w/v)  
392 NaBH<sub>4</sub> in PBS. For clathrin and ARPC3-HaloTag imaging, cells were fixed for 20 min in 4%  
393 (v/v) PFA (Electron Microscopy Sciences, Cat#: 15710) in CB. Subsequently, both types of  
394 samples were washed 3 times for 10 min in PBS. Samples were then blocked for 20 min in  
395 blocking buffer [3% (w/v) BSA and 0.1% (w/v) Saponin in PBS]. Clathrin light chain  
396 (Invitrogen, Cat#: MA5-11860, 1:200 dilution) and Halotag (Promega, Cat#: G9281, 1:200  
397 dilution) antibodies were used in blocking solution. Primary antibody immunostaining was  
398 performed overnight at 4°C. On the next day, samples were washed three times in washing  
399 buffer (0.1x blocking buffer in PBS) for 10 min. Samples were incubated with secondary  
400 antibody in blocking buffer for 30 min at room temperature in the dark and were washed three  
401 times for 10 min in washing buffer, and then three times for 10 min in PBS. Homemade mouse

402 secondary antibody-CF680 (1:50) was used to stain clathrin and actin samples. Commercial  
403 mouse secondary antibody-AF647 (ThermoFisher, cat#A32787; 1:400) and homemade rabbit  
404 secondary antibody-CF680 (1:50) were used to stain the clathrin and ARPC3-HaloTag. Clathrin  
405 and actin samples were then stained with 0.5 $\mu$ M Phalloidin-AF647 (Fisher Scientific, Cat#: A22287) in PBS and kept at room temperature in the dark for 2 hours. Samples were washed  
406 three times with PBS before STORM imaging.

408

409 STORM imaging was performed as previously described on a homebuilt STORM setup<sup>7,52</sup>.  
410 Samples labeled by AF647 and CF680 were excited by an 647nm laser. The emission of both  
411 AF647 and CF680 was then split into two light paths as two channels using a dichroic mirror  
412 (Chroma, cat#T685lpxr), and each channel was projected onto one-half of an EMCCD camera  
413 (Andor iXon Ultra 897). Color assignment of each localization was based on its intensity in the  
414 two channels. A cylindrical lens was inserted into the transmitted channel to acquire 3D  
415 localization<sup>28</sup>. 3D position of each localization was determined from the ellipticity of each point  
416 spread function.

417

**Fig. 1: Two-color, 3D stochastic optical reconstruction microscopy (STORM) shows that actin structures are off-centered with respect to clathrin coats.**

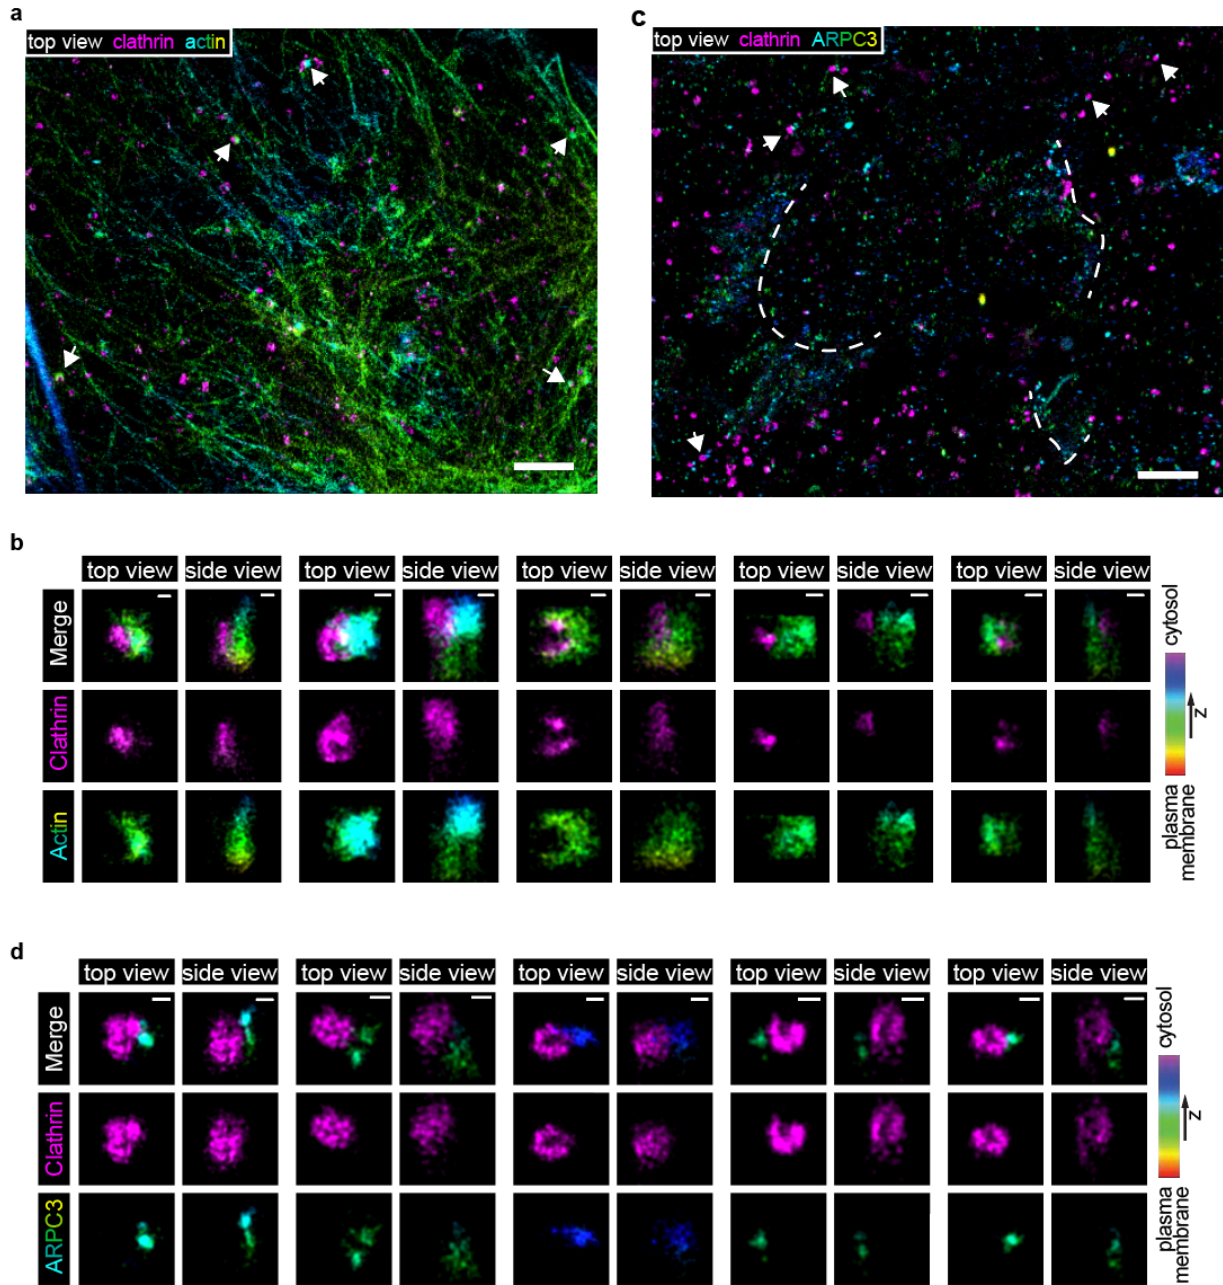

418

419 **Fig. 1: Two-color, 3D stochastic optical reconstruction microscopy (STORM) shows that**

420 **actin structures are off-centered with respect to clathrin coats. a, b, Two-color 3D STORM**

421 **image of bottom membrane of ADA cells immunolabeled with clathrin light chain antibody**

422 **(clathrin, CF-680, magenta) and phalloidin (actin, AF647, rainbow). c, d, Two color 3D STORM**

423 image of the bottom membrane of ADA cells immunolabeled with clathrin light chain antibody  
424 (clathrin, AF647, magenta) and HaloTag antibody (ARPC3-HaloTag, CF-680, rainbow). Dotted  
425 lines label lamellipodia. **b, d**, The highlighted CME sites, which are labeled by white arrows in  
426 **(a)** and **(c)**, are rotated and shown in magnified top and side view projections. Color bar shows  
427 the z position of ARPC3-HaloTag. Scale bars: 2 $\mu$ m, 100nm.

**Fig. 2: Triple-genome-edited iPS cells reveal dynamic actin organization at CME sites.**

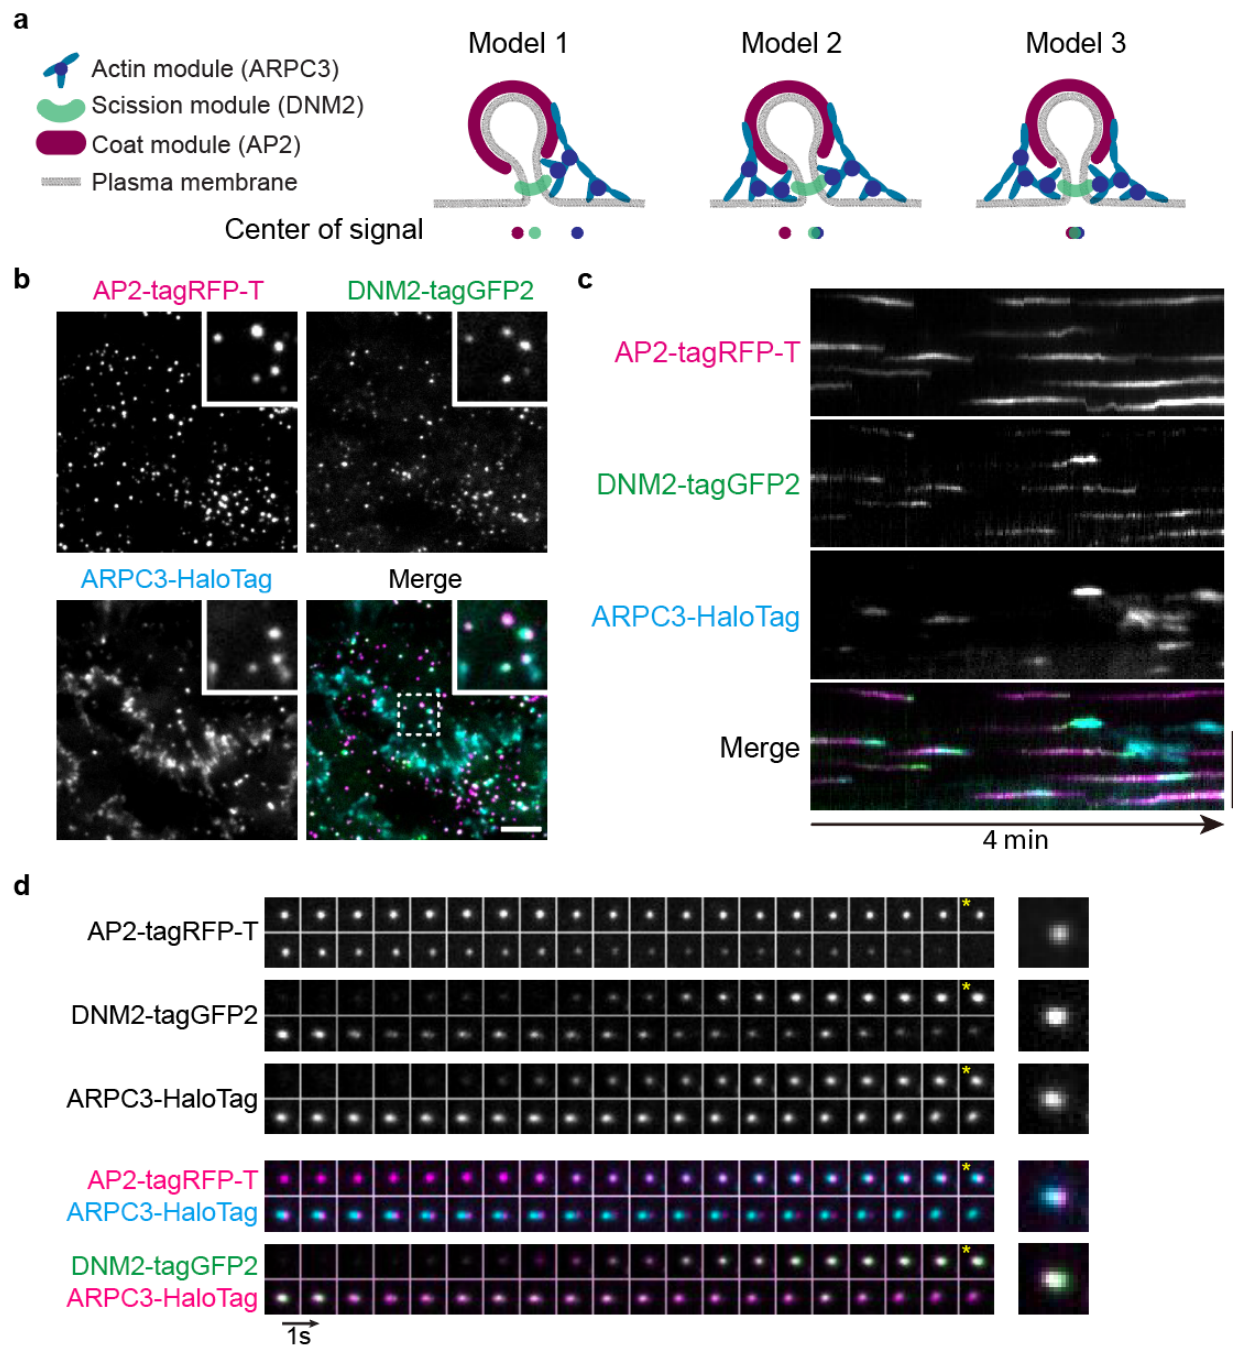

428

429 **Fig. 2: Triple-genome-edited iPS cells reveal dynamic actin organization at CME sites. a,**

430 Models of branched actin assembly at invaginating CME sites. Model 1: Asymmetric actin

431 assembly at CME sites results in separated actin-coat and actin-neck signals. Model 2:

432 Symmetric actin assembly at tilted CME sites results in separated actin-coat signals but

433 overlapped actin-neck signals. Model 3: Symmetric actin assembly at perpendicularly  
434 invaginating CME sites will result overlapped actin, coat and neck signals. **b**, A representative  
435 single time frame image of a TIRF movie (Supplementary Video 2) of AP2M1-tagRFP-T  
436 (magenta), DNM2-tagGFP2 (green) and JF635 ligand<sup>50</sup>-conjugated ARPC3-HaloTag (cyan) in  
437 ADA cells. The highlighted region is boxed by a dashed line. Scale bar: 5 $\mu$ m. **c**, A representative  
438 kymograph of AP2M1-tagRFP-T (magenta), DNM2-tagGFP2 (green) and JF635 ligand-  
439 conjugated ARPC3-HaloTag (cyan) at CME sites in ADA cells. Scale bar: 5 $\mu$ m. **d**, Montage of a  
440 representative ARPC3 positive CME site in ADA cells. Individual channels and pair-wise  
441 merges are shown. \*: Images from one frame before scission (maximum DNM2 intensity) are  
442 marked to show the displacement between the CME coat (AP2)-ARPC3 and CME neck  
443 (DNM2)-ARPC3. Size of field of view: 2 $\mu$ m x 2 $\mu$ m. Intervals: 1sec.

**Fig. 3: Computational analysis of ARPC3 positive CME sites reveals asymmetric actin network assembly at the late stage of CME.**

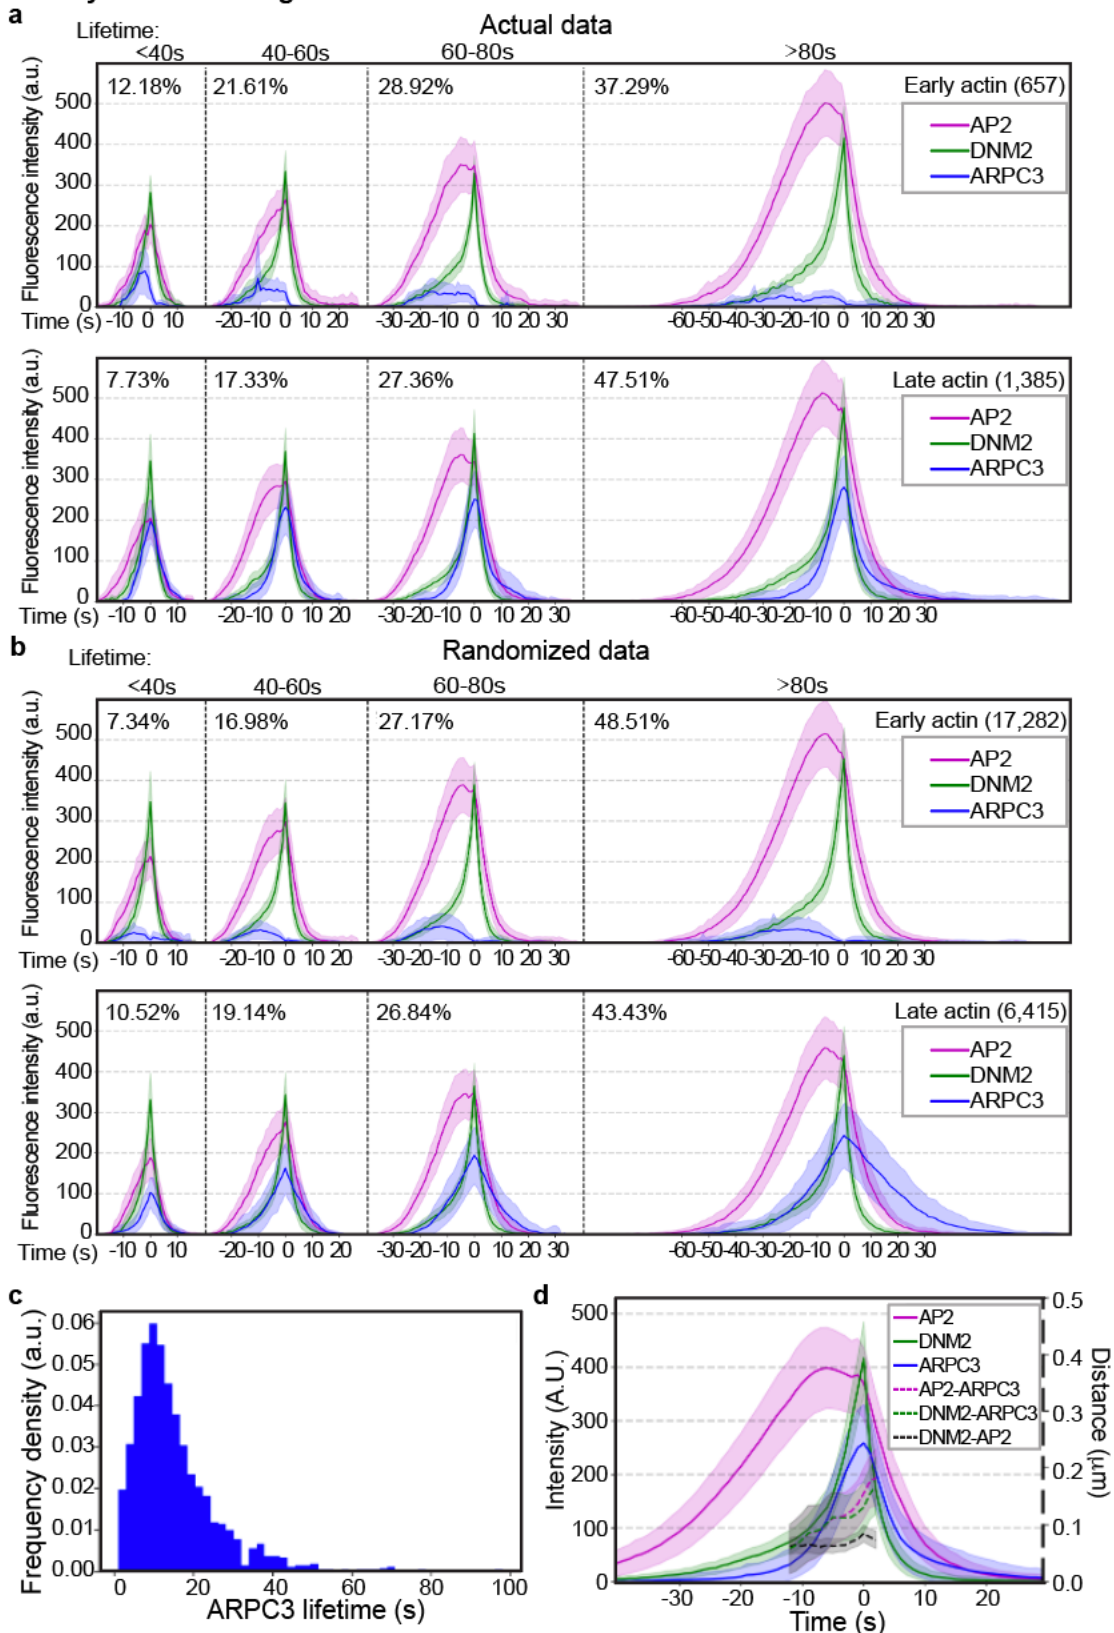



445 **Fig. 3: Computational analysis of ARPC3 positive CME sites reveals asymmetric actin**  
446 **network assembly at the late stage of CME. a, b,** Averaged intensity vs time plots of cohorts  
447 of ARPC3 positive CME sites in ADA cells (**a**) and in the randomized data set (**b**). Events are  
448 grouped by the timing of ARPC3-labeled branched actin network recruitment (early: top, late:  
449 bottom), and then grouped into cohorts by the lifetimes of AP2 and aligned to the frames  
450 showing the maximum DNM2 intensity (time = 0s). Total number of CME sites in each group is  
451 shown in parentheses. Percentage of the number of the CME sites in each cohort is shown next to  
452 the plot. **c,** Histogram of ARPC3-mediated actin network assembly duration. The assembly  
453 duration is measured from the first frame of the ARPC3 signal to the presumed scission time (the  
454 peak of DNM2 signal). **d,** Averaged intensity (solid lines) and distance (dashed lines) vs time  
455 plots of ARPC3 positive CME sites in ADA cells. Events are aligned to the frames showing the  
456 maximum DNM2 intensity (time = 0s). Distance between centers of two signals are shown from  
457 -10s to 3s when DNM2 and ARPC3 signals are relatively high. N=1,385. **a, b, d,** Error bar:  $\frac{1}{4}$   
458 standard deviation.

**Fig. 4: Actin positive CME sites show distinct dynamics.**

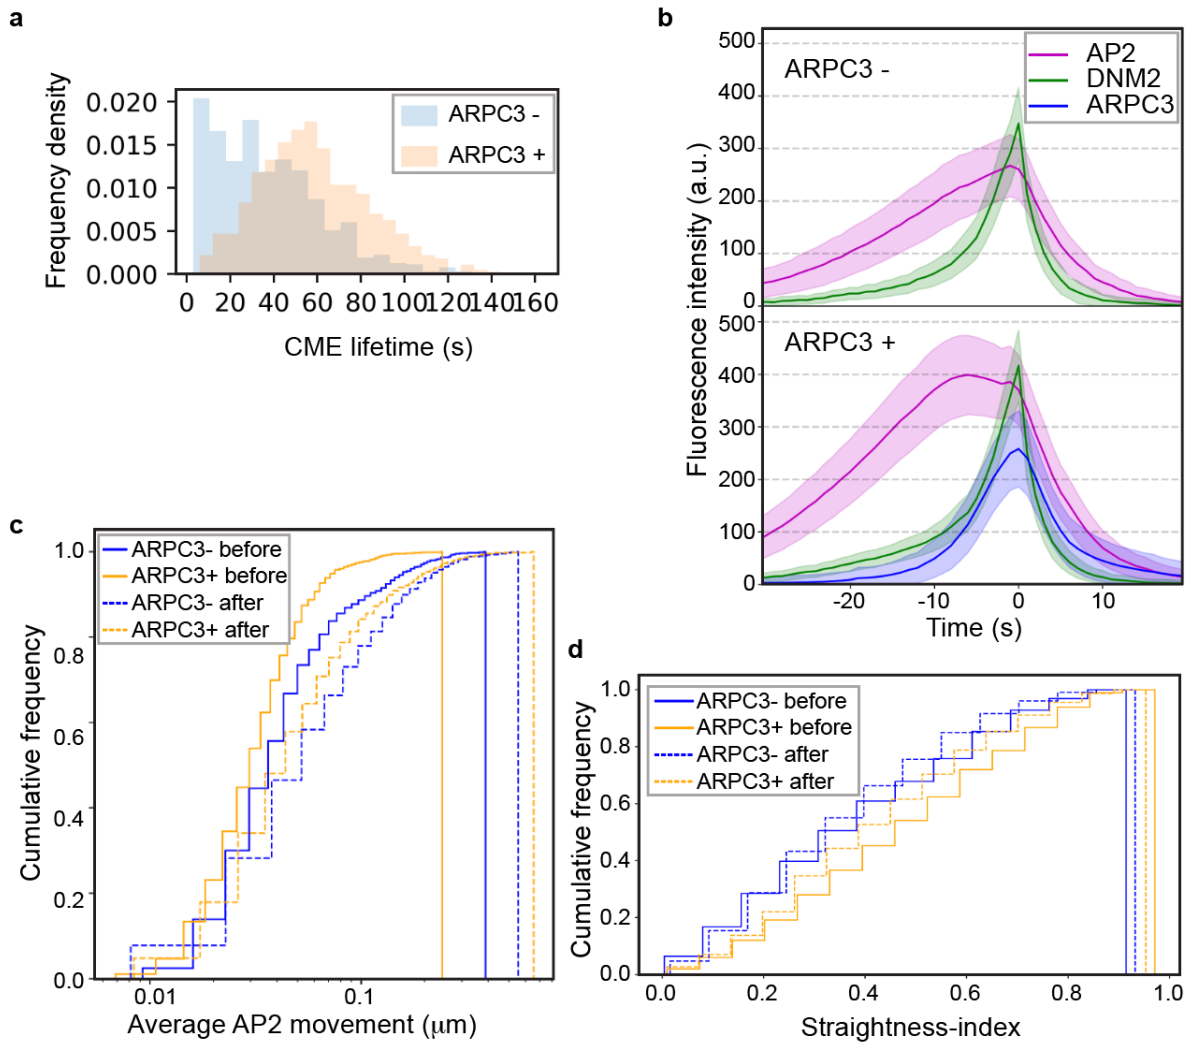

459

460 **Fig. 4: Actin positive CME sites show distinct dynamics.** **a**, Histograms of ARPC3 negative  
461 (blue) and positive (orange) CME lifetimes. CME lifetime is measured from the first frame of the  
462 AP2 signal to the presumed scission time (the peak of DNM2 signal). ARPC3 positive CME  
463 events have longer lifetimes. **b**, Averaged intensity vs time plots of ARPC3 negative (top) and  
464 positive (bottom) CME sites in ADA cells. Events were aligned to the frames showing the  
465 maximum DNM2 intensity. Error bar:  $\frac{1}{4}$  standard deviation. **c**, Lateral motility of ARPC3  
466 negative (blue) and positive (yellow) CME sites before (solid line) and after (dashed line) vesicle

467 scission. ARPC3 positive CME sites move slower than ARPC3 negative ones. **d**, Straightness-  
468 index of ARPC3 negative (blue) and positive (yellow) CME sites before (solid line) and after  
469 (dashed line) scission. The straightness-index is defined by the ratio between the sum of frame-  
470 to-frame distances to the end-to-end distance of a single event's trajectory, where a perfectly  
471 straight-lined trajectory would have an index of 1. ARPC3 positive CME sites move with a  
472 straighter trajectory. **a-d**, ARPC3 -: N=840, ARPC3 +: N=1,385.  
473

**Fig. 5: Asymmetric N-WASP recruitment to stalled CME sites.**

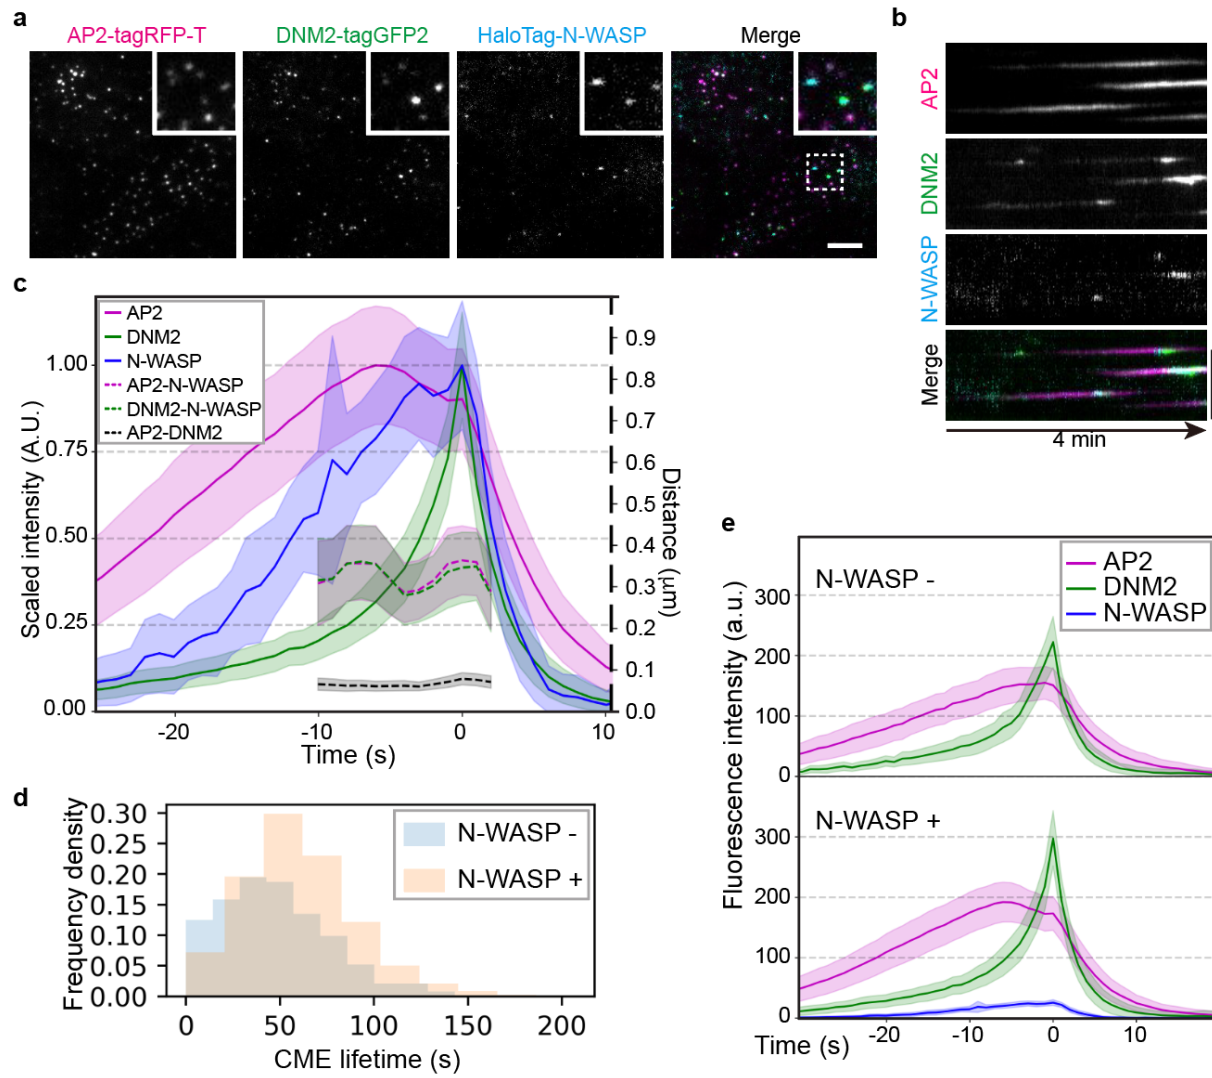

474

475 **Fig. 5: Asymmetric N-WASP recruitment to stalled CME sites.** **a**, A representative single  
 476 time frame image of a TIRF movie (Supplementary Video 4) of AP2M1-tagRFP-T (magenta),  
 477 DNM2-tagGFP2 (green) and JF635 ligand-conjugated HaloTag-N-WASP (cyan) in ADW cells.  
 478 The highlighted region is boxed by a dashed line. Scale bar: 5 $\mu$ m. **b**, A representative  
 479 kymograph of CME sites in ADW cells over a 4 min movie. Scale bar: 5 $\mu$ m. **c**, Averaged  
 480 intensity (solid line) and distance (dashed line) vs time plots of N-WASP positive CME sites in  
 481 ADW cells. Events are aligned to the frames showing the maximum DNM2 intensity. Intensity is  
 482 scaled to 1 at peaks for each channel. Error bar:  $\frac{1}{4}$  standard deviation. **d**, N-WASP positive CME

483 events have longer lifetimes. **e**, Intensity vs time plots of averaged N-WASP negative (top) and  
484 positive (bottom) CME sites in ADW cells. Events were aligned to the frames showing the  
485 maximum DNM2 intensity. Error bar:  $\frac{1}{4}$  standard deviation. **c-d**, N-WASP negative CME sites:  
486 N=385, N-WASP positive CME sites: N=1,381  
487

**Fig. 6: An updated schematic model of actin negative and actin positive CCPs in human cells.**

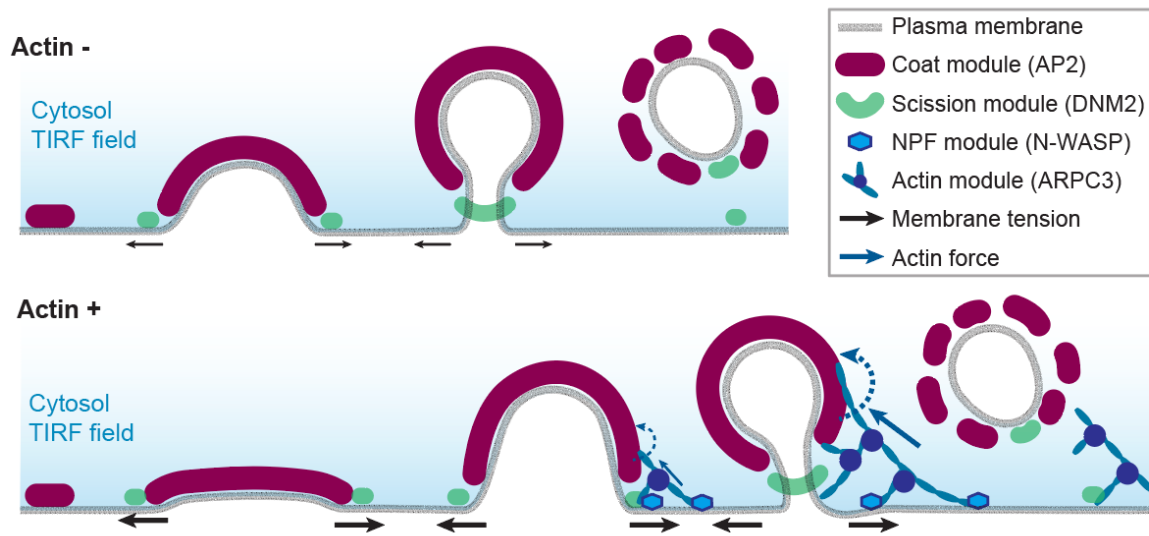

488

489 **Fig. 6: An updated schematic model of actin-negative and actin-positive clathrin-coated**

490 **pits in human cells.** Actin assembly is induced at stalled CME sites, where asymmetric forces

491 pull, bend and possibly twist the plasma membrane against membrane tension to drive membrane

492 invagination and vesicle scission.

493

**Supplementary Fig. 1: Genome-edited iPSCs show dynamic CME sites.**

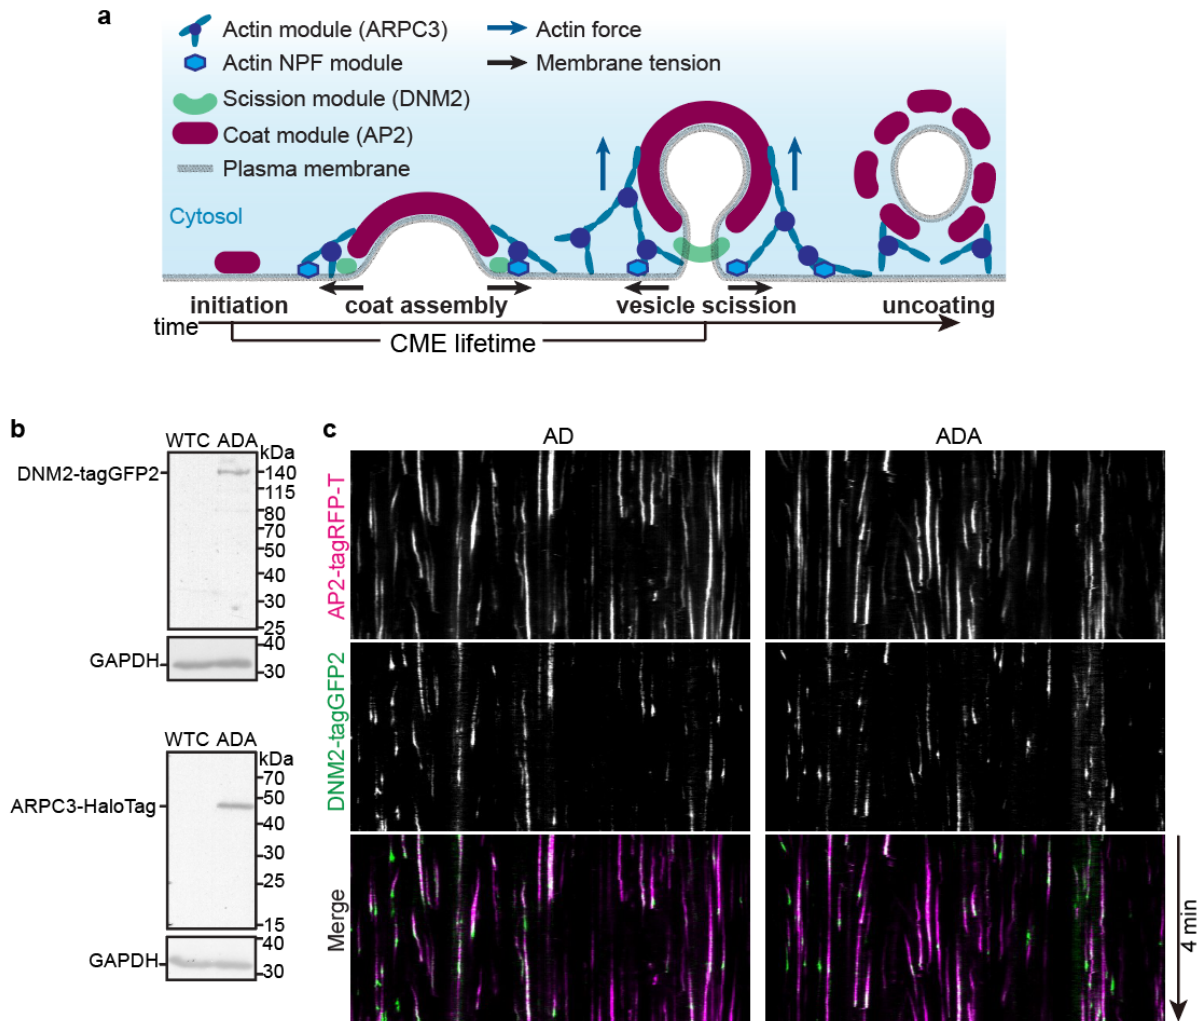

494

495 **Supplementary Fig 1: Genome-edited iPSCs show dynamic CME sites. a**, Schematic model

496 of CME. Mammalian CME proteins can be grouped into several modules, including the coat,

497 WASP and Myosin / actin nucleation promoting factor (NPF), actin and scission modules<sup>5</sup>. Actin

498 networks provide pulling forces to invaginate the membrane against membrane tension<sup>4,6,9,12</sup>. **b**,

499 Immunoblot analysis of cell extracts from the WT (WTC) and genome-edited (AP2M1-tagRFP-

500 T/DNM2-tagGFP2/ARPC3-HaloTag; ADA) human iPSCs. The labeled proteins were detected

501 with tag(CGY)FP, HaloTag, and GAPDH (loading control) antisera respectively. **c**, Kymograph

502 of representative CME sites of double-edited (AP2M1-tagRFP-T/DNM2-tagGFP2; AD) and  
503 triple-edited (AP2M1-tagRFP-T/DNM2-tagGFP2/ARPC3-HaloTag; ADA) cells.



**Supplementary Fig 2: Actin assembles at different types of CME sites.**

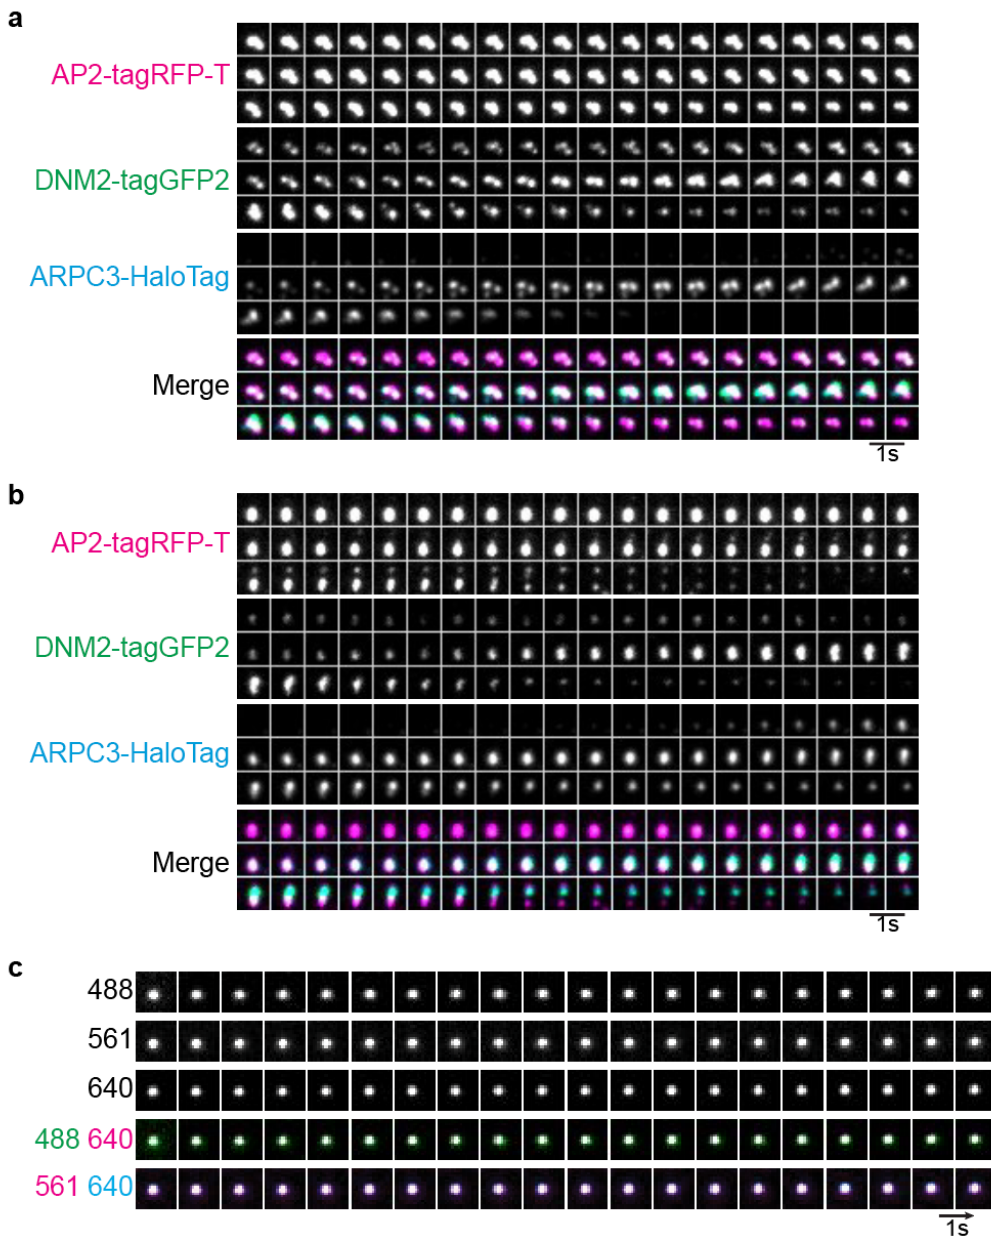

505 **Supplementary Fig 2. Actin assembles at different types of CME sites. a,** Montage of a  
506 representative ARPC3 positive CME plaque from a TIRF movie of triple-edited (AP2M1-  
507 tagRFP-T/DNM2-tagGFP2/ARPC3-HaloTag; ADA) human iPSCs (Supplementary Video 2). **b,**  
508 Montage of a representative ARPC3 positive splitting CME site from a TIRF movie of triple-  
509 edited (AP2M1-tagRFP-T/DNM2-tagGFP2/ARPC3-HaloTag; ADA) human iPSCs

- 510 (Supplementary Video 2). **c**, Montage from a TIRF movie of a multi-fluorescence bead
- 511 (Supplementary Video 3). Size of field of view:  $2\mu\text{m} \times 2\mu\text{m}$ . Intervals: 1sec.

**Supplementary Fig 3: Filtering methods for selection of CME sites.**

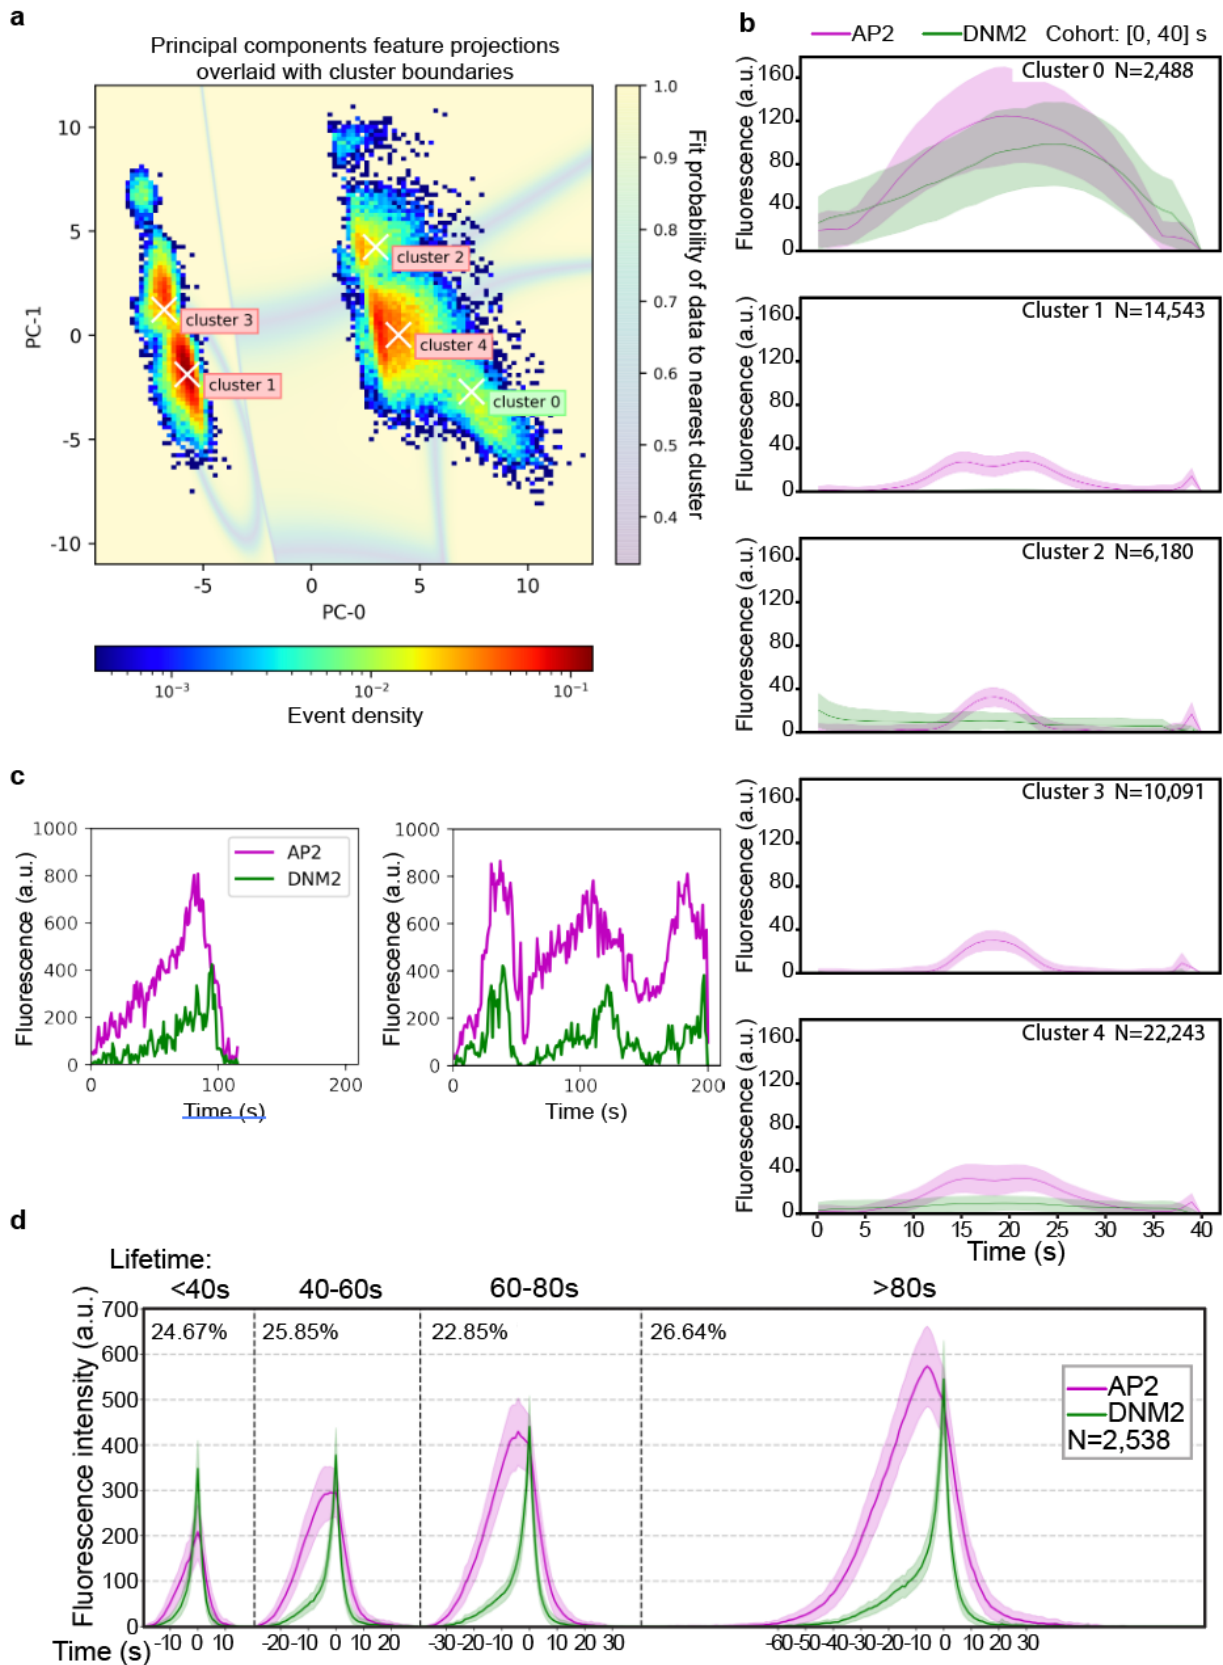

513 **Supplementary Fig 3. Filtering methods for selection of CME sites. a**, 2-D histogram of the  
514 first two principal components (PCs) of AP2 and DNM2 dynamic features. The shaded underlay  
515 represents simulated data points in principal component space and their individual probabilities  
516 of belonging to the nearest cluster center. Cluster 0 shows data points in the DNM2-positive  
517 cluster. **b**, Cohort plots of the shortest AP2 events (<40 seconds) from each cluster. Cluster 0  
518 represents DNM2-positive events where a strong DNM2 signal is detected. **c**, DNM2-positive  
519 events are sorted by the number of DNM2 peaks using a peak-detection scheme. Representative  
520 intensity vs time plots of a single-peaked event (left) and a multi-peaked event (right). **d**, Single-  
521 peaked DNM2 events, hereon named CME sites, are grouped into lifetime cohorts and aligned to  
522 the peak of the DNM2 channel.  
523

### Supplementary Fig 4: AP2-ARPC3 separation is not due to imaging artifacts.

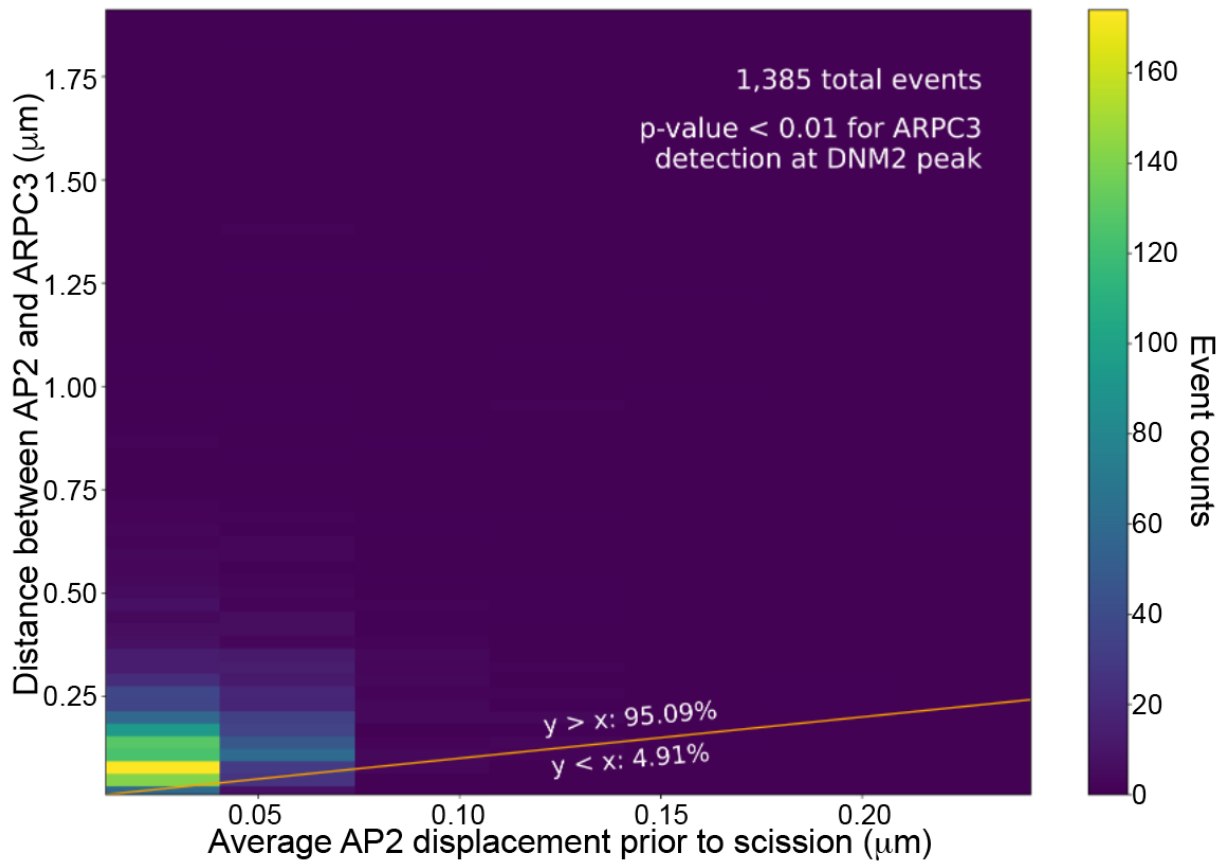

524

525 **Supplementary Fig 4: AP2-ARPC3 separation is not due to imaging artifacts.** A heat map

526 graph of distance between AP2 and ARPC3 signals before scission, and average AP2 frame to

527 frame displacement within 6 seconds before scission. Over 95% of the CME events present

528 larger AP2-ARPC3 separation than AP2 displacement. N= 1,385.

### Supplementary Fig 5. Dynamics of N-WASP at CME sites.

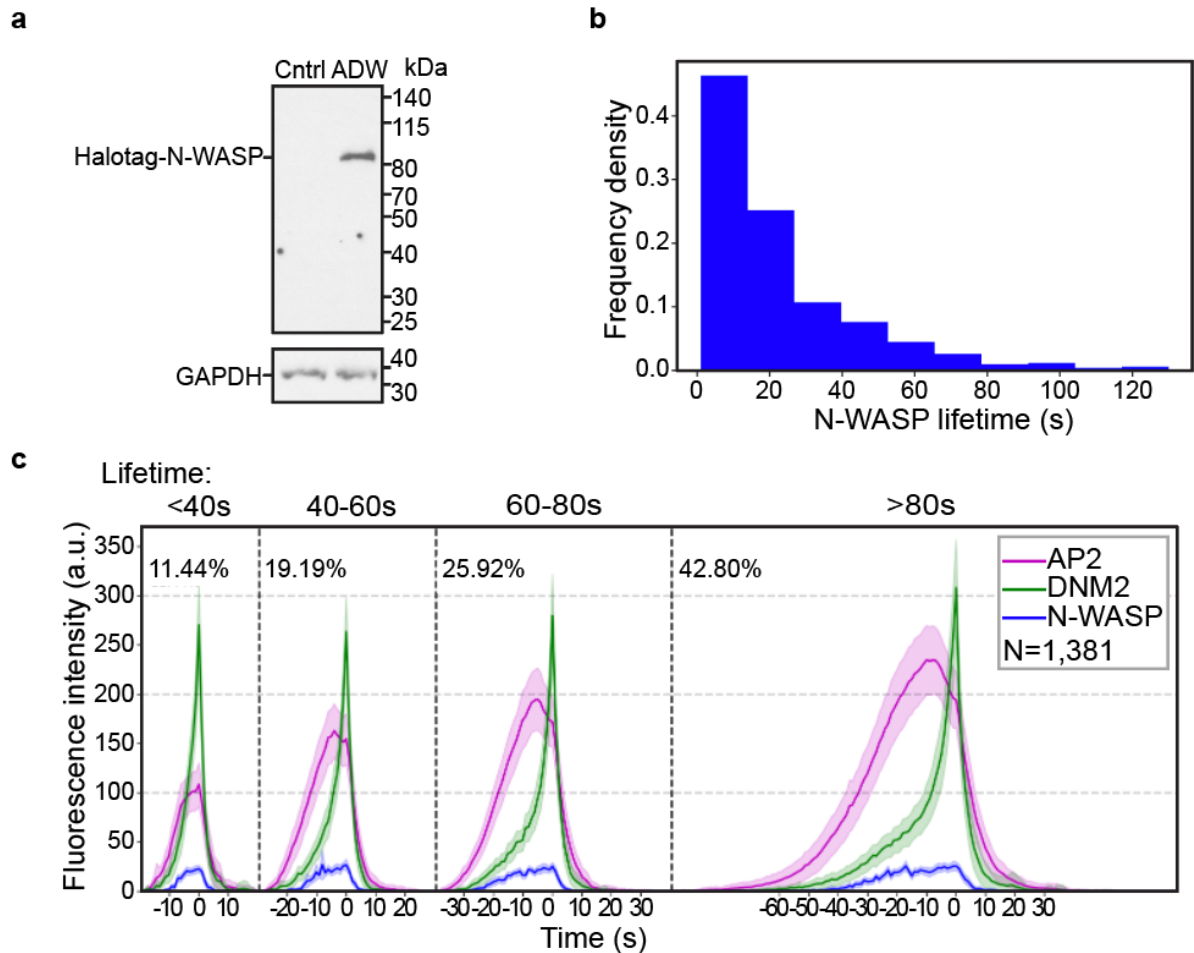

529

530 **Supplementary Fig 5: Dynamics of N-WASP at CME sites.** **a**, Immunoblot analysis of cell  
531 extracts from the control and genome-edited (AP2M1-tagRFP-T/DNM2-tagGFP2/HaloTag-  
532 WASL; ADW) human iPSCs. The labeled proteins were detected with HaloTag and GAPDH  
533 (loading control) antisera respectively. **b**, Histogram of N-WASP lifetime at CME sites. The  
534 lifetime is measured from the first frame of the N-WASP signal to the presumed scission time  
535 (the peak of DNM2 signal). **c**, Intensity vs time plots of cohorts of N-WASP positive CME sites  
536 in ADW cells. Events are grouped into cohorts by the lifetimes of AP2 and aligned to the frames  
537 showing the maximum DNM2 intensity. N=1,381. Error bar: 1/4 standard deviation.

538

**Supplementary Fig 6: Constant curvature vs constant area models for how clathrin coats assemble at actin-positive CME sites.**

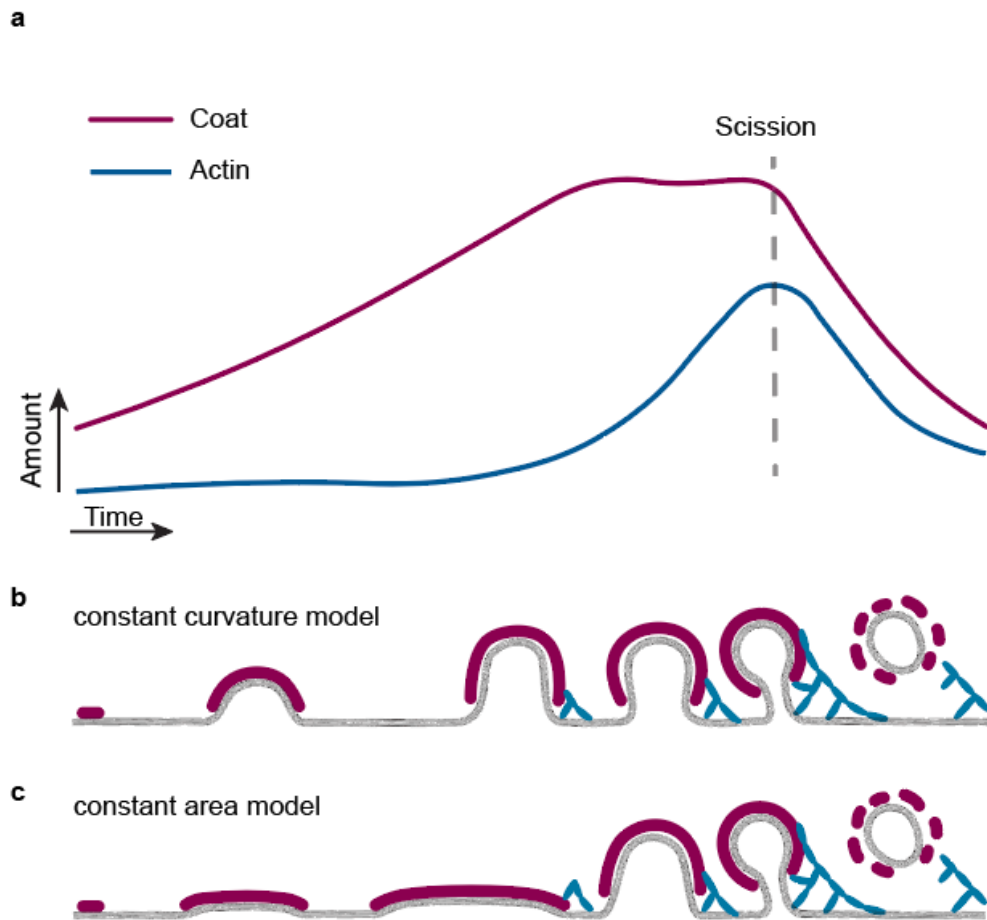

539

540 **Supplementary Fig 6: Constant curvature vs constant area models for how clathrin coats**

541 **assemble at actin-positive CME sites. a,** A sketch showing amounts of CME coat and actin

542 module proteins at actin-positive CME sites as a function of time based on the data in Fig. 4b.

543 The CME coat is assembled to its maximum area around the time of actin assembly initiation. **b,**

544 Schematic representation of constant curvature model for CME. CME coat assembles during

545 invagination and actin assembles only at deep invaginations. **c,** Schematic representation of

546 constant area model for CME. The CME coat expands to its maximum area first and bends

547 during membrane invagination. In these two different scenarios, actin assembles at CME sites  
548 with different curvatures.  
549



550 **REFERENCES**

551

- 552 1. Rottner, K., Faix, J., Bogdan, S., Linder, S. & Kerkhoff, E. Actin assembly mechanisms at  
553 a glance. *J. Cell Sci.* **130**, 3427–3435 (2017).
- 554 2. Lu, R., Drubin, D. G. & Sun, Y. Clathrin-mediated endocytosis in budding yeast at a  
555 glance. *J. Cell Sci.* **129**, 1531–6 (2016).
- 556 3. Lacy, M. M., Ma, R., Ravindra, N. G. & Berro, J. Molecular mechanisms of force  
557 production in clathrin-mediated endocytosis. *FEBS Letters* (2018). doi:10.1002/1873-  
558 3468.13192
- 559 4. Hassinger, J. E., Oster, G., Drubin, D. G. & Rangamani, P. Design principles for robust  
560 vesiculation in clathrin-mediated endocytosis. *Proc. Natl. Acad. Sci. U. S. A.* (2017).  
561 doi:10.1073/pnas.1617705114
- 562 5. Lanzetti, L. Actin in membrane trafficking. *Current Opinion in Cell Biology* (2007).  
563 doi:10.1016/j.ceb.2007.04.017
- 564 6. Boulant, S., Kural, C., Zeeh, J. C., Ubelmann, F. & Kirchhausen, T. Actin dynamics  
565 counteract membrane tension during clathrin-mediated endocytosis. *Nat. Cell Biol.* **13**,  
566 1124–1132 (2011).
- 567 7. Kaplan, C. *et al.* Adaptive actin organization buffers endocytosis against changes in  
568 membrane tension. *bioRxiv* (2021).
- 569 8. Batchelder, E. M. & Yarar, D. Differential requirements for clathrin-dependent  
570 endocytosis at sites of cell-substrate adhesion. *Mol. Biol. Cell* **21**, 3070–3079 (2010).
- 571 9. Kaur, S., Fielding, A. B., Gassner, G., Carter, N. J. & Royle, S. J. An unmet actin  
572 requirement explains the mitotic inhibition of clathrin-mediated endocytosis. *Elife* **3**, 1–17

- 573 (2014).
- 574 10. Grassart, A. *et al.* Actin and dynamin2 dynamics and interplay during clathrin-mediated  
575 endocytosis. *J. Cell Biol.* (2014). doi:10.1083/jcb.201403041
- 576 11. Boulant, S., Kural, C., Zeeh, J. C., Ubelmann, F. & Kirchhausen, T. Actin dynamics  
577 counteract membrane tension during clathrin-mediated endocytosis. *Nat. Cell Biol.*  
578 (2011). doi:10.1038/ncb2307
- 579 12. Akamatsu, M. *et al.* Principles of self-organization and load adaptation by the actin  
580 cytoskeleton during clathrin-mediated endocytosis. *Elife* (2020). doi:10.7554/eLife.49840
- 581 13. Mund, M. *et al.* Systematic Nanoscale Analysis of Endocytosis Links Efficient Vesicle  
582 Formation to Patterned Actin Nucleation. *Cell* (2018). doi:10.1016/j.cell.2018.06.032
- 583 14. Yarar, D., Waterman-Storer, C. M. & Schmid, S. L. A dynamic actin cytoskeleton  
584 functions at multiple stages of clathrin-mediated endocytosis. *Mol. Biol. Cell* **16**, 964–975  
585 (2005).
- 586 15. Collins, A., Warrington, A., Taylor, K. A. & Svitkina, T. Structural organization of the  
587 actin cytoskeleton at sites of clathrin-mediated endocytosis. *Curr. Biol.* (2011).  
588 doi:10.1016/j.cub.2011.05.048
- 589 16. Taylor, M. J., Perrais, D. & Merrifield, C. J. A high precision survey of the molecular  
590 dynamics of mammalian clathrin-mediated endocytosis. *PLoS Biol.* **9**, e1000604 (2011).
- 591 17. Kaksonen, M., Toret, C. P. & Drubin, D. G. A modular design for the clathrin- and actin-  
592 mediated endocytosis machinery. *Cell* **123**, 305–20 (2005).
- 593 18. Dambournet, D. *et al.* Genome-edited human stem cells expressing fluorescently labeled  
594 endocytic markers allow quantitative analysis of clathrin-mediated endocytosis during  
595 differentiation. *J. Cell Biol.* **217**, 3301–3311 (2018).

- 596 19. Doyon, J. B. *et al.* Rapid and efficient clathrin-mediated endocytosis revealed in genome-  
597 edited mammalian cells. *Nat. Cell Biol.* **13**, 331–7 (2011).
- 598 20. Cocucci, E., Gaudin, R. & Kirchhausen, T. Dynamin recruitment and membrane scission  
599 at the neck of a clathrin-coated pit. *Mol. Biol. Cell* **25**, 3595–3609 (2014).
- 600 21. Gibson, T. J., Seiler, M. & Veitia, R. A. The transience of transient overexpression. *Nat.*  
601 *Methods* **10**, 715–21 (2013).
- 602 22. Taylor, M. J., Lampe, M. & Merrifield, C. J. A feedback loop between dynamin and actin  
603 recruitment during clathrin-mediated endocytosis. *PLoS Biol.* **10**, e1001302 (2012).
- 604 23. Merrifield, C. J., Feldman, M. E., Wan, L. & Almers, W. Imaging actin and dynamin  
605 recruitment during invagination of single clathrin-coated pits. *Nat. Cell Biol.* (2002).  
606 doi:10.1038/ncb837
- 607 24. María Cabeza, J., Acosta, J. & Alés, E. Dynamics and Regulation of Endocytotic Fission  
608 Pores: Role of Calcium and Dynamin. *Traffic* (2010). doi:10.1111/j.1600-  
609 0854.2010.01120.x
- 610 25. Ramachandran, R. & Schmid, S. L. Real-time detection reveals that effectors couple  
611 dynamin's GTP-dependent conformational changes to the membrane. *EMBO J.* (2008).  
612 doi:10.1038/sj.emboj.7601961
- 613 26. Roux, A. *et al.* Membrane curvature controls dynamin polymerization. *Proc. Natl. Acad.*  
614 *Sci. U. S. A.* (2010). doi:10.1073/pnas.0913734107
- 615 27. Iversen, T. G., Skretting, G., Van Deurs, B. & Sandvig, K. Clathrin-coated pits with long,  
616 dynamin-wrapped necks upon expression of a clathrin antisense RNA. *Proc. Natl. Acad.*  
617 *Sci. U. S. A.* (2003). doi:10.1073/pnas.0534231100
- 618 28. Huang, B., Wang, W., Bates, M. & Zhuang, X. Three-Dimensional Super-Resolution

- 619 Reconstruction Microscopy. *Science*. **319**, 810–813 (2008).
- 620 29. Xu, K., Babcock, H. P. & Zhuang, X. Dual-objective STORM reveals three-dimensional  
621 filament organization in the actin cytoskeleton. *Nat. Methods* **9**, 185–188 (2012).
- 622 30. Aguet, F., Antonescu, C. N., Mettlen, M., Schmid, S. L. & Danuser, G. Advances in  
623 analysis of low signal-to-noise images link dynamin and AP2 to the functions of an  
624 endocytic checkpoint. *Dev. Cell* (2013). doi:10.1016/j.devcel.2013.06.019
- 625 31. Li, D. *et al.* Extended-resolution structured illumination imaging of endocytic and  
626 cytoskeletal dynamics. *Science*. (2015). doi:10.1126/science.aab3500
- 627 32. Bucher, D. *et al.* Clathrin-Adaptor ratio and membrane tension regulate the flat-To-curved  
628 transition of the clathrin coat during endocytosis. *Nat. Commun.* (2018).  
629 doi:10.1038/s41467-018-03533-0
- 630 33. Saleem, M. *et al.* A balance between membrane elasticity and polymerization energy sets  
631 the shape of spherical clathrin coats. *Nat. Commun.* (2015). doi:10.1038/ncomms7249
- 632 34. Liu, A. P., Loerke, D., Schmid, S. L. & Danuser, G. Global and local regulation of  
633 clathrin-coated pit dynamics detected on patterned substrates. *Biophys. J.* **97**, 1038–1047  
634 (2009).
- 635 35. Sun, Y. *et al.* Switch-like Arp2/3 activation upon WASP and WIP recruitment to an  
636 apparent threshold level by multivalent linker proteins in vivo. *Elife* **6**, 1–25 (2017).
- 637 36. Yoshida, A. *et al.* Morphological changes of plasma membrane and protein assembly  
638 during clathrin-mediated endocytosis. *PLoS Biol.* **16**, (2018).
- 639 37. Cheng, X. *et al.* Dynamin-dependent vesicle twist at the final stage of clathrin-mediated  
640 endocytosis. *Nat. Cell Biol.* **23**, 859–869 (2021).
- 641 38. Kaksonen, M., Sun, Y. & Drubin, D. G. A Pathway for Association of Receptors,

- 642           Adaptors, and Actin during Endocytic Internalization. *Cell* **115**, 475–87 (2003).
- 643   39.   Aghamohammadzadeh, S. & Ayscough, K. R. Differential requirements for actin during  
644           yeast and mammalian endocytosis. *Nat. Cell Biol.* **11**, 1039–42 (2009).
- 645   40.   Ferguson, S. *et al.* Coordinated Actions of Actin and BAR Proteins Upstream of Dynamin  
646           at Endocytic Clathrin-Coated Pits. *Dev. Cell* **17**, 811–22 (2009).
- 647   41.   Durrbach, A., Louvard, D. & Coudrier, E. Actin filaments facilitate two steps of  
648           endocytosis. *J. Cell Sci.* **109**, 457–65 (1996).
- 649   42.   Lamaze, C., Fujimoto, L. M., Yin, H. L. & Schmid, S. L. The actin cytoskeleton is  
650           required for receptor-mediated endocytosis in mammalian cells. *J. Biol. Chem.* **272**,  
651           20332–5 (1997).
- 652   43.   Miya Fujimoto, L., Roth, R., Heuser, J. E. & Schmid, S. L. Actin assembly plays a  
653           variable, but not obligatory role in receptor-mediated endocytosis in mammalian cells.  
654           *Traffic* (2000). doi:10.1034/j.1600-0854.2000.010208.x
- 655   44.   Lampe, M., Vassilopoulos, S. & Merrifield, C. Clathrin coated pits, plaques and adhesion.  
656           *J. Struct. Biol.* (2016). doi:10.1016/j.jsb.2016.07.009
- 657   45.   Avinoam, O., Schorb, M., Beese, C. J., Briggs, J. A. G. & Kaksonen, M. Endocytic sites  
658           mature by continuous bending and remodeling of the clathrin coat. *Science.* (2015).  
659           doi:10.1126/science.aaa9555
- 660   46.   Scott, B. L. *et al.* Membrane bending occurs at all stages of clathrincoat assembly and  
661           defines endocytic dynamics. *Nat. Commun.* (2018). doi:10.1038/s41467-018-02818-8
- 662   47.   Sochacki, K. A. *et al.* The structure and spontaneous curvature of clathrin lattices at the  
663           plasma membrane. *bioRxiv* (2020).
- 664   48.   Kaksonen, M. & Roux, A. Mechanisms of clathrin-mediated endocytosis. *Nature Reviews*

- 665            *Molecular Cell Biology* (2018). doi:10.1038/nrm.2017.132
- 666    49.    Hong, S. H., Cortesio, C. L. & Drubin, D. G. Machine-Learning-Based Analysis in  
667            Genome-Edited Cells Reveals the Efficiency of Clathrin-Mediated Endocytosis. *Cell Rep.*  
668            **12**, 2121–2130 (2015).
- 669    50.    Grimm, J. B. *et al.* A general method to fine-tune fluorophores for live-cell and in vivo  
670            imaging. *Nat. Methods* **14**, 987–994 (2017).
- 671    51.    Loerke, D. *et al.* Cargo and dynamin regulate clathrin-coated pit maturation. *PLoS Biol.* **7**,  
672            0628–0639 (2009).
- 673    52.    Wojcik, M., Hauser, M., Li, W., Moon, S. & Xu, K. Graphene-enabled electron  
674            microscopy and correlated super-resolution microscopy of wet cells. *Nat. Commun.* **6**, 2–7  
675            (2015).
- 676
